# Supplementary material for: Outgassing behaviour during highly explosive basaltic eruptions
Source: Springer Nature journal article supplement (doi:10.1038/s43247-023-01182-w), 2024-01-02
Supplement: MOESM3 [file 43247_2023_1182_MOESM3_ESM.pdf › 43247_2023_1182_MOESM3_ESM.pdf]

## **Description of Additional Supplementary Files**

**File name:** Supplementary Data 1

**Description:** Exponential and power law equations characterizing the vesicle size distributions of samples from the Fontana Lapilli, Masaya Triple Layer and Etna eruptions.

**File name:** Supplementary Data 2

**Description:** Tortuosity, presented as the mean value and standard deviation for each sample.

**File name:** Supplementary Data 3

**Description:** Results of the sensitivity analysis, performed using the Masaya Triple Layer composition and initial conditions, for a conduit radius of 25 m, 10 m and 5 m.

**File name:** Supplementary Data 4

**Description:** Results of the sensitivity analysis using the Etna 122 BC composition and initial conditions.
