# Supplementary material for: Outgassing behaviour during highly explosive basaltic eruptions
Source: Springer Nature journal article supplement (doi:10.1038/s43247-023-01182-w), 2024-01-02
Supplement: MOESM4 [file 43247_2023_1182_MOESM4_ESM.xlsx]

## Sheet: Sheet1
Outgassing behaviour during highly explosive basaltic eruptions
Emily C. Bamber, Giuseppe La Spina, Fabio Arzilli, Margherita Polacci, Lucia Mancini, Mattia de' Michieli Vitturi, Daniele Andronico, Rosa Anna Corsaro, Mike R. Burton
Supplementary Data 1
Exponential and power law equations characterising the vesicle size distributions of samples from the Fontana Lapilli (FL), Masaya Triple Layer (MTL) and Etna eruptions.
Sample	N (> V) =	r2	N (> V) =	r2
	Exponential		Power Law
FL_AB_1	NA		2.1 x 109 V-1.1	0.9915
FL_AB_2	NA		6.7 x 108 V-1.2	0.9967
FL_D_1	NA		4.4 x 109 V-1.2	0.9737
FL_D_2	NA		6.3 x 108 V-1.1	0.9784
FL_E_1	NA		8.5 x 108 V-1.2	0.9905
FL_E_2	NA		1.8 x 1010 V-1.3	0.9204
FL_F_1	NA		1.7 x 1011 V-1.5	0.9821
FL_F_2	NA		3.9 x 109 V-1.1	0.9522
FL_LG_1	NA		9.7 x 107 V-0.9	0.9937
FL_LG_2	3319 x exp(-3.5 10-6 V)	0.8197	2.7 x 1010 V-1.3	0.9613
MTL1_a0_1	NA		2.4 x 109 V-1.1	0.995
MTL1_a0_2	NA		6.3 x 1013 V-1.9	0.9607
MTL2_a0_1	NA		1 x 1012 V-1.5	0.9078
MTL2_a0_2	3458 x exp(-3.4 10-6 V)	0.846	5.6 x 108 V-1.1	0.9955
MTL3_a0_1	NA		4.3 x 108 V-1.0	0.9655
MTL3_a0_2	NA		4.9 x 109 V-1.2	0.9784
Etna122_C1_1	NA		2.3 x 1010 V-1.3	0.9666
Etna122_C3_1	NA		2.3 x 1013 V-1.7	0.9697
Etna2013_1	NA		5.2 x 109 V-1.2	0.987
Etna2001_1	NA		1 x 107 V-0.8	0.9934
