# Supplementary material for: Outgassing behaviour during highly explosive basaltic eruptions
Source: Springer Nature journal article supplement (doi:10.1038/s43247-023-01182-w), 2024-01-02
Supplement: MOESM5 [file 43247_2023_1182_MOESM5_ESM.xlsx]

## Sheet: Sheet1
Outgassing behaviour during highly explosive basaltic eruptions
Emily C. Bamber, Giuseppe La Spina, Fabio Arzilli, Margherita Polacci, Lucia Mancini, Mattia de' Michieli Vitturi, Daniele Andronico, Rosa Anna Corsaro, Mike R. Burton
Supplementary Data 2
Tortuosity, presented as the mean value (τ) and standard deviation (1σ) for each sample. The mean tortuosity is calculated using a number of segments (n).
Supplementary information for the samples is also provided.
Sample	Sample Details	Sample Volume (mm3)	τ	σ	n
FL_AB_1	Crystal-poor	5.63	1.54	0.48	165
FL_AB_2	Crystal-poor	4.69	1.54	0.61	32
FL_D_1	Crystal-poor	6.01	3.32	1.85	1583
FL_D_2	Crystal-poor	6.01	1.5	0.47	420
FL_E_1	Crystal-poor	6.01	1.47	0.48	338
FL_E_2	Crystal-poor	6.01	1.53	0.56	1382
FL_F_1	Crystal-poor	6.01
FL_F_2	Crystal-poor	4.01	1.5	0.49	15125
FL_LG_1	Crystal-poor	6.01	1.51	0.5	5516
FL_LG_2	Crystal-poor	4.01	1.43	0.39	282
MTL1_a0_1	Crystal-rich	6.01	3.39	1.17	31826
MTL1_a0_2	Crystal-rich	5.01	1.48	0.5	1354
MTL2_a0_1	Crystal-rich	6.01	1.39	0.42	5650
MTL2_a0_2	Crystal-poor	6.01
MTL3_a0_1	Crystal-rich	6.01	1.34	0.35	5007
MTL3_a0_2	Crystal-rich	3	1.4	0.4	8045
Etna122_C1_1	Crystal-rich	6.01	2.98	0.86	26138
Etna122_C3_1	Crystal-rich	6.01	3.41	1.34	166458
Etna2013_1	Crystal-poor	5.63	1.5	0.39	511
Etna2001_1	Crystal-poor	6.01	1.45	0.56	380
