# Supplementary material for: Outgassing behaviour during highly explosive basaltic eruptions
Source: Springer Nature journal article supplement (doi:10.1038/s43247-023-01182-w), 2024-01-02
Supplement: MOESM6 [file 43247_2023_1182_MOESM6_ESM.xlsx]

## Sheet: Sheet1
Outgassing behaviour during highly explosive basaltic eruptions
Emily C. Bamber, Giuseppe La Spina, Fabio Arzilli, Margherita Polacci, Lucia Mancini, Mattia de' Michieli Vitturi, Daniele Andronico, Rosa Anna Corsaro, Mike R. Burton
Supplementary Data 3
Results of the sensitivity analysis, performed using the Masaya Triple Layer (MTL) composition and initial conditions, for a conduit radius of 25 m, 10 m and 5 m.

## Sheet: MTL25m_Explosive
Log10 BND (Nd)	Frequency	Tortuosity factor (m)	Frequency	Throat-pore ratio (ftb)	Frequency	Log10 Friction coefficient (f0)	Frequency	Log10 MER (kg/s)	Frequency	Exit velocity (m/s)	Frequency	Log10 Exit pressure (Pa)	Frequency
9.0254	33	1.055	49	0.034943	101	-4.9749	66	5.9347	0	0.91532	0	5.0119	0
9.0754	27	1.1449	65	0.044641	100	-4.9249	62	5.9514	0	2.201	0	5.0245	5
9.1254	35	1.2348	71	0.05434	100	-4.8749	61	5.968	0	3.4866	0	5.0371	22
9.1754	32	1.3247	58	0.064038	100	-4.8249	69	5.9847	0	4.7723	0	5.0496	26
9.2254	36	1.4145	65	0.073737	100	-4.7749	65	6.0014	0	6.0579	0	5.0622	37
9.2754	33	1.5044	65	0.083435	100	-4.7249	58	6.0181	0	7.3436	0	5.0748	51
9.3253	31	1.5943	59	0.093133	98	-4.6749	64	6.0348	0	8.6292	0	5.0874	44
9.3753	30	1.6842	65	0.10283	97	-4.6249	62	6.0515	0	9.9149	0	5.1	73
9.4253	36	1.7741	61	0.11253	97	-4.5749	70	6.0682	0	11.201	0	5.1125	70
9.4753	41	1.864	63	0.12223	95	-4.5249	69	6.0849	0	12.486	0	5.1251	81
9.5253	38	1.9539	61	0.13193	96	-4.4749	61	6.1016	0	13.772	0	5.1377	85
9.5753	43	2.0438	55	0.14163	96	-4.4249	66	6.1183	0	15.058	0	5.1503	85
9.6253	39	2.1337	72	0.15132	93	-4.3749	64	6.135	0	16.343	0	5.1629	70
9.6753	34	2.2236	64	0.16102	93	-4.3249	62	6.1516	0	17.629	0	5.1754	79
9.7253	45	2.3135	69	0.17072	91	-4.2749	66	6.1683	0	18.914	0	5.188	83
9.7753	41	2.4034	67	0.18042	96	-4.2249	65	6.185	0	20.2	0	5.2006	83
9.8253	42	2.4933	62	0.19012	90	-4.1749	64	6.2017	0	21.486	0	5.2132	70
9.8753	43	2.5832	64	0.19982	87	-4.1249	60	6.2184	0	22.771	0	5.2258	78
9.9253	39	2.673	68	0.20951	90	-4.075	65	6.2351	0	24.057	0	5.2383	76
9.9753	42	2.7629	69	0.21921	86	-4.025	61	6.2518	0	25.343	0	5.2509	72
10.025	37	2.8528	67	0.22891	92	-3.975	64	6.2685	0	26.628	0	5.2635	80
10.075	45	2.9427	69	0.23861	85	-3.925	69	6.2852	0	27.914	0	5.2761	73
10.125	49	3.0326	62	0.24831	77	-3.875	62	6.3019	0	29.2	0	5.2887	85
10.175	50	3.1225	64	0.25801	90	-3.825	64	6.3186	0	30.485	0	5.3012	82
10.225	41	3.2124	82	0.2677	86	-3.775	66	6.3352	0	31.771	0	5.3138	98
10.275	50	3.3023	71	0.2774	89	-3.725	70	6.3519	0	33.057	0	5.3264	93
10.325	49	3.3922	74	0.2871	88	-3.675	54	6.3686	0	34.342	0	5.339	88
10.375	69	3.4821	69	0.2968	85	-3.625	64	6.3853	0	35.628	0	5.3516	94
10.425	49	3.572	69	0.3065	80	-3.575	60	6.402	0	36.914	0	5.3641	68
10.475	55	3.6619	67	0.3162	80	-3.525	71	6.4187	0	38.199	0	5.3767	96
10.525	53	3.7518	71	0.32589	81	-3.475	62	6.4354	15	39.485	0	5.3893	66
10.575	60	3.8417	72	0.33559	81	-3.425	67	6.4521	50	40.771	0	5.4019	88
10.625	51	3.9316	71	0.34529	77	-3.375	63	6.4688	67	42.056	0	5.4145	77
10.675	59	4.0214	74	0.35499	78	-3.325	61	6.4855	97	43.342	0	5.427	79
10.725	56	4.1113	67	0.36469	73	-3.275	56	6.5021	120	44.628	0	5.4396	70
10.775	52	4.2012	75	0.37439	73	-3.225	57	6.5188	142	45.913	0	5.4522	88
10.825	64	4.2911	66	0.38408	78	-3.175	74	6.5355	134	47.199	0	5.4648	71
10.875	72	4.381	67	0.39378	82	-3.125	64	6.5522	127	48.484	0	5.4774	86
10.925	72	4.4709	75	0.40348	78	-3.075	57	6.5689	129	49.77	0	5.4899	72
10.975	54	4.5608	65	0.41318	85	-3.0251	57	6.5856	113	51.056	0	5.5025	70
11.025	70	4.6507	70	0.42288	79	-2.9751	66	6.6023	122	52.341	0	5.5151	94
11.075	78	4.7406	73	0.43258	79	-2.9251	63	6.619	114	53.627	0	5.5277	65
11.125	67	4.8305	75	0.44227	73	-2.8751	63	6.6357	113	54.913	0	5.5403	71
11.175	78	4.9204	74	0.45197	78	-2.8251	59	6.6524	122	56.198	0	5.5528	55
11.225	80	5.0103	78	0.46167	78	-2.7751	59	6.6691	136	57.484	0	5.5654	71
11.275	73	5.1002	77	0.47137	74	-2.7251	65	6.6857	139	58.77	0	5.578	75
11.325	74	5.1901	75	0.48107	72	-2.6751	64	6.7024	121	60.055	0	5.5906	63
11.375	79	5.28	76	0.49077	68	-2.6251	73	6.7191	113	61.341	0	5.6032	53
11.425	78	5.3698	76	0.50046	70	-2.5751	76	6.7358	116	62.627	0	5.6157	81
11.475	82	5.4597	67	0.51016	67	-2.5251	69	6.7525	120	63.912	0	5.6283	76
11.525	73	5.5496	77	0.51986	65	-2.4751	69	6.7692	109	65.198	0	5.6409	64
11.575	80	5.6395	75	0.52956	71	-2.4251	67	6.7859	106	66.484	0	5.6535	67
11.625	85	5.7294	75	0.53926	83	-2.3751	67	6.8026	115	67.769	0	5.6661	47
11.675	92	5.8193	69	0.54896	74	-2.3251	70	6.8193	113	69.055	0	5.6786	54
11.725	89	5.9092	75	0.55866	60	-2.2751	68	6.836	98	70.341	0	5.6912	51
11.775	88	5.9991	75	0.56835	59	-2.2251	65	6.8527	119	71.626	0	5.7038	64
11.825	91	6.089	81	0.57805	70	-2.1751	67	6.8693	104	72.912	0	5.7164	53
11.875	95	6.1789	73	0.58775	62	-2.1251	69	6.886	92	74.198	0	5.729	48
11.925	96	6.2688	81	0.59745	65	-2.0751	63	6.9027	90	75.483	0	5.7415	48
11.975	94	6.3587	85	0.60715	71	-2.0251	69	6.9194	99	76.769	0	5.7541	50
12.025	95	6.4486	79	0.61685	67	-1.9752	70	6.9361	78	78.054	0	5.7667	48
12.075	95	6.5385	84	0.62654	62	-1.9252	68	6.9528	104	79.34	0	5.7793	51
12.125	96	6.6284	68	0.63624	67	-1.8752	76	6.9695	95	80.626	0	5.7919	57
12.175	98	6.7182	73	0.64594	56	-1.8252	71	6.9862	99	81.911	0	5.8044	49
12.225	100	6.8081	72	0.65564	72	-1.7752	70	7.0029	72	83.197	0	5.817	54
12.275	97	6.898	78	0.66534	59	-1.7252	78	7.0196	67	84.483	0	5.8296	61
12.325	100	6.9879	82	0.67504	61	-1.6752	70	7.0363	86	85.768	0	5.8422	52
12.375	100	7.0778	77	0.68473	61	-1.6252	84	7.0529	76	87.054	0	5.8548	53
12.425	99	7.1677	85	0.69443	61	-1.5752	76	7.0696	69	88.34	0	5.8673	48
12.475	100	7.2576	77	0.70413	69	-1.5252	87	7.0863	61	89.625	0	5.8799	39
12.525	100	7.3475	81	0.71383	59	-1.4752	90	7.103	63	90.911	0	5.8925	38
12.575	101	7.4374	81	0.72353	63	-1.4252	88	7.1197	71	92.197	0	5.9051	53
12.625	99	7.5273	77	0.73323	62	-1.3752	80	7.1364	79	93.482	0	5.9177	57
12.675	100	7.6172	79	0.74292	73	-1.3252	92	7.1531	68	94.768	0	5.9302	48
12.725	100	7.7071	82	0.75262	70	-1.2752	77	7.1698	75	96.054	0	5.9428	37
12.775	100	7.797	83	0.76232	62	-1.2252	81	7.1865	75	97.339	0	5.9554	52
12.825	100	7.8869	78	0.77202	60	-1.1752	87	7.2032	67	98.625	0	5.968	57
12.875	100	7.9767	76	0.78172	65	-1.1252	93	7.2198	48	99.911	0	5.9806	54
12.925	100	8.0666	79	0.79142	67	-1.0752	94	7.2365	63	101.2	16	5.9931	62
12.975	100	8.1565	82	0.80111	67	-1.0252	88	7.2532	74	102.48	37	6.0057	61
13.025	100	8.2464	82	0.81081	61	-0.97525	95	7.2699	57	103.77	79	6.0183	78
13.075	100	8.3363	84	0.82051	62	-0.92526	97	7.2866	71	105.05	106	6.0309	62
13.125	100	8.4262	83	0.83021	71	-0.87526	90	7.3033	73	106.34	130	6.0435	71
13.175	100	8.5161	82	0.83991	64	-0.82527	98	7.32	79	107.62	143	6.056	74
13.225	100	8.606	89	0.84961	69	-0.77527	92	7.3367	86	108.91	163	6.0686	80
13.275	100	8.6959	86	0.8593	59	-0.72527	96	7.3534	94	110.2	190	6.0812	72
13.325	100	8.7858	82	0.869	57	-0.67528	99	7.3701	88	111.48	204	6.0938	103
13.375	100	8.8757	89	0.8787	58	-0.62528	97	7.3868	98	112.77	238	6.1064	103
13.425	100	8.9656	83	0.8884	60	-0.57529	100	7.4034	100	114.05	311	6.1189	107
13.475	100	9.0555	81	0.8981	58	-0.52529	98	7.4201	135	115.34	355	6.1315	91
13.525	100	9.1454	89	0.9078	61	-0.4753	99	7.4368	135	116.62	394	6.1441	137
13.575	100	9.2353	81	0.91749	57	-0.4253	97	7.4535	137	117.91	428	6.1567	120
13.625	99	9.3251	87	0.92719	63	-0.37531	98	7.4702	151	119.2	436	6.1693	121
13.675	101	9.415	87	0.93689	50	-0.32531	100	7.4869	161	120.48	438	6.1818	143
13.725	100	9.5049	86	0.94659	55	-0.27532	100	7.5036	160	121.77	399	6.1944	149
13.775	100	9.5948	86	0.95629	53	-0.22532	100	7.5203	189	123.05	406	6.207	180
13.825	100	9.6847	76	0.96599	63	-0.17533	100	7.537	233	124.34	401	6.2196	153
13.875	100	9.7746	88	0.97568	62	-0.12533	99	7.5537	191	125.62	627	6.2322	156
13.925	100	9.8645	90	0.98538	69	-0.075338	100	7.5704	230	126.91	1114	6.2447	170
13.975	100	9.9544	89	0.99508	52	-0.025342	101	7.587	236	128.19	834	6.2573	184

## Sheet: MTL25m_NonExplosive
Log10 BND (Nd)	Frequency	Tortuosity factor (m)	Frequency	Throat-pore ratio (ftb)	Frequency	Log10 Friction coefficient (f0)	Frequency	Log10 MER (kg/s)	Frequency	Exit velocity (m/s)	Frequency	Log10 Exit pressure (Pa)	Frequency
9.0254	61	1.055	39	0.034943	0	-4.9749	34	5.9347	3	0.91532	2235	5.0119	2235
9.0754	67	1.1449	26	0.044641	0	-4.9249	37	5.9514	1	2.201	0	5.0245	0
9.1254	63	1.2348	22	0.05434	0	-4.8749	36	5.968	5	3.4866	0	5.0371	0
9.1754	61	1.3247	35	0.064038	0	-4.8249	24	5.9847	5	4.7723	0	5.0496	0
9.2254	57	1.4145	27	0.073737	0	-4.7749	32	6.0014	3	6.0579	0	5.0622	0
9.2754	60	1.5044	28	0.083435	0	-4.7249	39	6.0181	0	7.3436	0	5.0748	0
9.3253	67	1.5943	37	0.093133	1	-4.6749	31	6.0348	0	8.6292	0	5.0874	0
9.3753	64	1.6842	33	0.10283	1	-4.6249	31	6.0515	4	9.9149	0	5.1	0
9.4253	59	1.7741	38	0.11253	3	-4.5749	26	6.0682	4	11.201	0	5.1125	0
9.4753	51	1.864	33	0.12223	2	-4.5249	25	6.0849	8	12.486	0	5.1251	0
9.5253	57	1.9539	31	0.13193	3	-4.4749	34	6.1016	6	13.772	0	5.1377	0
9.5753	53	2.0438	40	0.14163	1	-4.4249	31	6.1183	4	15.058	0	5.1503	0
9.6253	56	2.1337	27	0.15132	5	-4.3749	29	6.135	5	16.343	0	5.1629	0
9.6753	61	2.2236	30	0.16102	4	-4.3249	35	6.1516	5	17.629	0	5.1754	0
9.7253	55	2.3135	28	0.17072	7	-4.2749	26	6.1683	16	18.914	0	5.188	0
9.7753	58	2.4034	28	0.18042	2	-4.2249	32	6.185	12	20.2	0	5.2006	0
9.8253	55	2.4933	33	0.19012	4	-4.1749	30	6.2017	16	21.486	0	5.2132	0
9.8753	52	2.5832	35	0.19982	9	-4.1249	38	6.2184	13	22.771	0	5.2258	0
9.9253	54	2.673	28	0.20951	7	-4.075	32	6.2351	16	24.057	0	5.2383	0
9.9753	56	2.7629	30	0.21921	14	-4.025	36	6.2518	28	25.343	0	5.2509	0
10.025	60	2.8528	31	0.22891	7	-3.975	31	6.2685	24	26.628	0	5.2635	0
10.075	47	2.9427	29	0.23861	11	-3.925	24	6.2852	46	27.914	0	5.2761	0
10.125	48	3.0326	32	0.24831	18	-3.875	31	6.3019	88	29.2	0	5.2887	0
10.175	48	3.1225	34	0.25801	7	-3.825	28	6.3186	228	30.485	0	5.3012	0
10.225	55	3.2124	18	0.2677	11	-3.775	29	6.3352	431	31.771	0	5.3138	0
10.275	44	3.3023	27	0.2774	10	-3.725	28	6.3519	489	33.057	0	5.3264	0
10.325	47	3.3922	23	0.2871	10	-3.675	39	6.3686	365	34.342	0	5.339	0
10.375	29	3.4821	27	0.2968	15	-3.625	29	6.3853	283	35.628	0	5.3516	0
10.425	50	3.572	29	0.3065	18	-3.575	33	6.402	122	36.914	0	5.3641	0
10.475	43	3.6619	30	0.3162	17	-3.525	24	6.4187	5	38.199	0	5.3767	0
10.525	44	3.7518	29	0.32589	15	-3.475	34	6.4354	0	39.485	0	5.3893	0
10.575	37	3.8417	28	0.33559	17	-3.425	30	6.4521	0	40.771	0	5.4019	0
10.625	42	3.9316	28	0.34529	16	-3.375	30	6.4688	0	42.056	0	5.4145	0
10.675	36	4.0214	20	0.35499	22	-3.325	33	6.4855	0	43.342	0	5.427	0
10.725	43	4.1113	29	0.36469	23	-3.275	34	6.5021	0	44.628	0	5.4396	0
10.775	41	4.2012	22	0.37439	22	-3.225	35	6.5188	0	45.913	0	5.4522	0
10.825	33	4.2911	29	0.38408	19	-3.175	24	6.5355	0	47.199	0	5.4648	0
10.875	22	4.381	29	0.39378	18	-3.125	35	6.5522	0	48.484	0	5.4774	0
10.925	25	4.4709	25	0.40348	16	-3.075	35	6.5689	0	49.77	0	5.4899	0
10.975	32	4.5608	34	0.41318	13	-3.0251	33	6.5856	0	51.056	0	5.5025	0
11.025	22	4.6507	28	0.42288	19	-2.9751	31	6.6023	0	52.341	0	5.5151	0
11.075	18	4.7406	24	0.43258	16	-2.9251	31	6.619	0	53.627	0	5.5277	0
11.125	23	4.8305	22	0.44227	24	-2.8751	35	6.6357	0	54.913	0	5.5403	0
11.175	14	4.9204	24	0.45197	18	-2.8251	35	6.6524	0	56.198	0	5.5528	0
11.225	14	5.0103	18	0.46167	21	-2.7751	31	6.6691	0	57.484	0	5.5654	0
11.275	21	5.1002	23	0.47137	22	-2.7251	29	6.6857	0	58.77	0	5.578	0
11.325	19	5.1901	22	0.48107	26	-2.6751	29	6.7024	0	60.055	0	5.5906	0
11.375	13	5.28	22	0.49077	30	-2.6251	23	6.7191	0	61.341	0	5.6032	0
11.425	16	5.3698	22	0.50046	27	-2.5751	20	6.7358	0	62.627	0	5.6157	0
11.475	12	5.4597	28	0.51016	31	-2.5251	29	6.7525	0	63.912	0	5.6283	0
11.525	18	5.5496	18	0.51986	32	-2.4751	29	6.7692	0	65.198	0	5.6409	0
11.575	13	5.6395	21	0.52956	24	-2.4251	32	6.7859	0	66.484	0	5.6535	0
11.625	8	5.7294	24	0.53926	14	-2.3751	28	6.8026	0	67.769	0	5.6661	0
11.675	4	5.8193	27	0.54896	25	-2.3251	30	6.8193	0	69.055	0	5.6786	0
11.725	5	5.9092	21	0.55866	39	-2.2751	26	6.836	0	70.341	0	5.6912	0
11.775	5	5.9991	24	0.56835	33	-2.2251	29	6.8527	0	71.626	0	5.7038	0
11.825	4	6.089	16	0.57805	28	-2.1751	28	6.8693	0	72.912	0	5.7164	0
11.875	4	6.1789	25	0.58775	35	-2.1251	28	6.886	0	74.198	0	5.729	0
11.925	1	6.2688	19	0.59745	33	-2.0751	35	6.9027	0	75.483	0	5.7415	0
11.975	2	6.3587	13	0.60715	26	-2.0251	26	6.9194	0	76.769	0	5.7541	0
12.025	1	6.4486	18	0.61685	29	-1.9752	27	6.9361	0	78.054	0	5.7667	0
12.075	2	6.5385	14	0.62654	35	-1.9252	25	6.9528	0	79.34	0	5.7793	0
12.125	1	6.6284	28	0.63624	27	-1.8752	23	6.9695	0	80.626	0	5.7919	0
12.175	1	6.7182	22	0.64594	40	-1.8252	27	6.9862	0	81.911	0	5.8044	0
12.225	0	6.8081	24	0.65564	25	-1.7752	27	7.0029	0	83.197	0	5.817	0
12.275	1	6.898	19	0.66534	34	-1.7252	18	7.0196	0	84.483	0	5.8296	0
12.325	0	6.9879	17	0.67504	27	-1.6752	26	7.0363	0	85.768	0	5.8422	0
12.375	0	7.0778	15	0.68473	37	-1.6252	16	7.0529	0	87.054	0	5.8548	0
12.425	0	7.1677	14	0.69443	37	-1.5752	22	7.0696	0	88.34	0	5.8673	0
12.475	0	7.2576	19	0.70413	27	-1.5252	12	7.0863	0	89.625	0	5.8799	0
12.525	0	7.3475	16	0.71383	38	-1.4752	10	7.103	0	90.911	0	5.8925	0
12.575	0	7.4374	18	0.72353	34	-1.4252	12	7.1197	0	92.197	0	5.9051	0
12.625	0	7.5273	22	0.73323	33	-1.3752	19	7.1364	0	93.482	0	5.9177	0
12.675	0	7.6172	14	0.74292	21	-1.3252	8	7.1531	0	94.768	0	5.9302	0
12.725	0	7.7071	13	0.75262	28	-1.2752	22	7.1698	0	96.054	0	5.9428	0
12.775	0	7.797	17	0.76232	31	-1.2252	19	7.1865	0	97.339	0	5.9554	0
12.825	0	7.8869	21	0.77202	38	-1.1752	12	7.2032	0	98.625	0	5.968	0
12.875	0	7.9767	21	0.78172	32	-1.1252	8	7.2198	0	99.911	0	5.9806	0
12.925	0	8.0666	16	0.79142	28	-1.0752	5	7.2365	0	101.2	0	5.9931	0
12.975	0	8.1565	15	0.80111	31	-1.0252	12	7.2532	0	102.48	0	6.0057	0
13.025	0	8.2464	16	0.81081	34	-0.97525	5	7.2699	0	103.77	0	6.0183	0
13.075	0	8.3363	14	0.82051	32	-0.92526	4	7.2866	0	105.05	0	6.0309	0
13.125	0	8.4262	14	0.83021	30	-0.87526	8	7.3033	0	106.34	0	6.0435	0
13.175	0	8.5161	18	0.83991	31	-0.82527	3	7.32	0	107.62	0	6.056	0
13.225	0	8.606	10	0.84961	29	-0.77527	7	7.3367	0	108.91	0	6.0686	0
13.275	0	8.6959	12	0.8593	34	-0.72527	4	7.3534	0	110.2	0	6.0812	0
13.325	0	8.7858	14	0.869	39	-0.67528	1	7.3701	0	111.48	0	6.0938	0
13.375	0	8.8757	10	0.8787	38	-0.62528	3	7.3868	0	112.77	0	6.1064	0
13.425	0	8.9656	16	0.8884	35	-0.57529	0	7.4034	0	114.05	0	6.1189	0
13.475	0	9.0555	16	0.8981	39	-0.52529	2	7.4201	0	115.34	0	6.1315	0
13.525	0	9.1454	11	0.9078	34	-0.4753	2	7.4368	0	116.62	0	6.1441	0
13.575	0	9.2353	18	0.91749	33	-0.4253	3	7.4535	0	117.91	0	6.1567	0
13.625	0	9.3251	9	0.92719	37	-0.37531	1	7.4702	0	119.2	0	6.1693	0
13.675	0	9.415	10	0.93689	44	-0.32531	0	7.4869	0	120.48	0	6.1818	0
13.725	0	9.5049	10	0.94659	41	-0.27532	0	7.5036	0	121.77	0	6.1944	0
13.775	0	9.5948	10	0.95629	40	-0.22532	1	7.5203	0	123.05	0	6.207	0
13.825	0	9.6847	19	0.96599	36	-0.17533	0	7.537	0	124.34	0	6.2196	0
13.875	0	9.7746	7	0.97568	35	-0.12533	0	7.5537	0	125.62	0	6.2322	0
13.925	0	9.8645	8	0.98538	26	-0.075338	0	7.5704	0	126.91	0	6.2447	0
13.975	0	9.9544	8	0.99508	45	-0.025342	0	7.587	0	128.19	0	6.2573	0

## Sheet: MTL10m_Explosive
Log10 BND (Nd)	Frequency	Tortuosity factor (m)	Frequency	Throat-pore ratio (ftb)	Frequency	Log10 Friction coefficient (f0)	Frequency	Log10 MER (kg/s)	Frequency	Exit velocity (m/s)	Frequency	Log10 Exit pressure (Pa)	Frequency
9.0254	25	1.055	41	0.034943	101	-4.9749	60	4.493	0	0.69721	0	5.0111	768
9.0754	17	1.1449	56	0.044641	100	-4.9249	57	4.5151	0	1.9752	0	5.0226	71
9.1254	24	1.2348	65	0.05434	100	-4.8749	57	4.5371	0	3.2531	0	5.034	78
9.1754	22	1.3247	56	0.064038	100	-4.8249	62	4.5591	0	4.5311	0	5.0455	62
9.2254	23	1.4145	58	0.073737	97	-4.7749	57	4.5812	0	5.809	0	5.057	77
9.2754	22	1.5044	61	0.083435	99	-4.7249	53	4.6032	0	7.087	0	5.0684	93
9.3253	25	1.5943	56	0.093133	96	-4.6749	53	4.6252	0	8.3649	0	5.0799	107
9.3753	26	1.6842	58	0.10283	95	-4.6249	59	4.6472	0	9.6429	0	5.0914	86
9.4253	25	1.7741	52	0.11253	96	-4.5749	64	4.6693	0	10.921	0	5.1028	78
9.4753	26	1.864	57	0.12223	92	-4.5249	66	4.6913	0	12.199	0	5.1143	96
9.5253	26	1.9539	53	0.13193	94	-4.4749	53	4.7133	0	13.477	0	5.1258	87
9.5753	34	2.0438	50	0.14163	94	-4.4249	63	4.7354	0	14.755	0	5.1373	92
9.6253	28	2.1337	66	0.15132	89	-4.3749	61	4.7574	0	16.033	0	5.1487	87
9.6753	26	2.2236	54	0.16102	87	-4.3249	58	4.7794	0	17.311	0	5.1602	67
9.7253	37	2.3135	61	0.17072	88	-4.2749	62	4.8015	0	18.589	0	5.1717	71
9.7753	35	2.4034	62	0.18042	90	-4.2249	63	4.8235	0	19.867	0	5.1831	91
9.8253	32	2.4933	55	0.19012	86	-4.1749	61	4.8455	0	21.144	0	5.1946	99
9.8753	28	2.5832	58	0.19982	82	-4.1249	52	4.8676	0	22.422	0	5.2061	67
9.9253	30	2.673	57	0.20951	87	-4.075	60	4.8896	0	23.7	0	5.2175	94
9.9753	32	2.7629	59	0.21921	79	-4.025	57	4.9116	0	24.978	0	5.229	87
10.025	29	2.8528	60	0.22891	90	-3.975	59	4.9337	0	26.256	0	5.2405	108
10.075	32	2.9427	60	0.23861	80	-3.925	65	4.9557	0	27.534	0	5.2519	95
10.125	40	3.0326	58	0.24831	72	-3.875	58	4.9777	0	28.812	0	5.2634	76
10.175	45	3.1225	57	0.25801	85	-3.825	58	4.9997	0	30.09	0	5.2749	85
10.225	33	3.2124	76	0.2677	81	-3.775	63	5.0218	0	31.368	0	5.2864	93
10.275	39	3.3023	67	0.2774	82	-3.725	66	5.0438	0	32.646	0	5.2978	76
10.325	41	3.3922	69	0.2871	83	-3.675	51	5.0658	0	33.924	0	5.3093	94
10.375	53	3.4821	63	0.2968	74	-3.625	59	5.0879	0	35.202	0	5.3208	58
10.425	42	3.572	59	0.3065	80	-3.575	54	5.1099	0	36.48	0	5.3322	84
10.475	38	3.6619	62	0.3162	77	-3.525	68	5.1319	0	37.758	0	5.3437	84
10.525	44	3.7518	65	0.32589	75	-3.475	58	5.154	0	39.036	0	5.3552	76
10.575	45	3.8417	63	0.33559	73	-3.425	60	5.176	0	40.314	0	5.3666	83
10.625	40	3.9316	63	0.34529	66	-3.375	57	5.198	0	41.592	0	5.3781	75
10.675	49	4.0214	70	0.35499	70	-3.325	60	5.2201	0	42.87	0	5.3896	76
10.725	44	4.1113	60	0.36469	62	-3.275	52	5.2421	0	44.148	0	5.401	55
10.775	44	4.2012	67	0.37439	66	-3.225	52	5.2641	0	45.426	0	5.4125	67
10.825	55	4.2911	61	0.38408	74	-3.175	69	5.2862	3	46.704	0	5.424	68
10.875	58	4.381	57	0.39378	76	-3.125	61	5.3082	3	47.982	0	5.4354	71
10.925	63	4.4709	71	0.40348	68	-3.075	51	5.3302	7	49.26	0	5.4469	71
10.975	45	4.5608	60	0.41318	81	-3.0251	51	5.3522	5	50.537	0	5.4584	65
11.025	51	4.6507	63	0.42288	71	-2.9751	62	5.3743	18	51.815	1	5.4699	67
11.075	63	4.7406	68	0.43258	68	-2.9251	58	5.3963	25	53.093	2	5.4813	63
11.125	57	4.8305	69	0.44227	64	-2.8751	55	5.4183	40	54.371	1	5.4928	66
11.175	64	4.9204	66	0.45197	73	-2.8251	56	5.4404	45	55.649	0	5.5043	63
11.225	69	5.0103	70	0.46167	70	-2.7751	54	5.4624	58	56.927	1	5.5157	66
11.275	65	5.1002	71	0.47137	65	-2.7251	58	5.4844	88	58.205	2	5.5272	48
11.325	66	5.1901	70	0.48107	66	-2.6751	59	5.5065	82	59.483	2	5.5387	59
11.375	72	5.28	67	0.49077	64	-2.6251	66	5.5285	80	60.761	1	5.5501	53
11.425	69	5.3698	75	0.50046	64	-2.5751	74	5.5505	116	62.039	4	5.5616	50
11.475	72	5.4597	58	0.51016	59	-2.5251	64	5.5726	115	63.317	2	5.5731	40
11.525	64	5.5496	70	0.51986	59	-2.4751	65	5.5946	155	64.595	2	5.5845	45
11.575	68	5.6395	70	0.52956	67	-2.4251	62	5.6166	146	65.873	2	5.596	48
11.625	75	5.7294	72	0.53926	75	-2.3751	64	5.6386	175	67.151	7	5.6075	53
11.675	83	5.8193	64	0.54896	72	-2.3251	64	5.6607	197	68.429	2	5.6189	42
11.725	86	5.9092	69	0.55866	57	-2.2751	65	5.6827	191	69.707	7	5.6304	44
11.775	80	5.9991	68	0.56835	56	-2.2251	61	5.7047	186	70.985	12	5.6419	41
11.825	88	6.089	75	0.57805	57	-2.1751	60	5.7268	152	72.263	6	5.6534	36
11.875	88	6.1789	64	0.58775	55	-2.1251	62	5.7488	188	73.541	6	5.6648	38
11.925	92	6.2688	76	0.59745	59	-2.0751	52	5.7708	169	74.819	11	5.6763	44
11.975	88	6.3587	78	0.60715	62	-2.0251	59	5.7929	193	76.097	10	5.6878	25
12.025	89	6.4486	72	0.61685	60	-1.9752	62	5.8149	180	77.375	13	5.6992	56
12.075	90	6.5385	76	0.62654	56	-1.9252	60	5.8369	177	78.652	12	5.7107	42
12.125	91	6.6284	63	0.63624	62	-1.8752	72	5.859	175	79.93	17	5.7222	42
12.175	92	6.7182	65	0.64594	51	-1.8252	60	5.881	150	81.208	18	5.7336	42
12.225	98	6.8081	68	0.65564	65	-1.7752	63	5.903	163	82.486	8	5.7451	30
12.275	91	6.898	75	0.66534	50	-1.7252	66	5.9251	163	83.764	17	5.7566	42
12.325	97	6.9879	75	0.67504	54	-1.6752	63	5.9471	127	85.042	19	5.768	52
12.375	100	7.0778	71	0.68473	52	-1.6252	72	5.9691	141	86.32	14	5.7795	27
12.425	99	7.1677	82	0.69443	56	-1.5752	68	5.9911	144	87.598	17	5.791	32
12.475	99	7.2576	75	0.70413	66	-1.5252	75	6.0132	130	88.876	31	5.8024	49
12.525	99	7.3475	75	0.71383	55	-1.4752	77	6.0352	136	90.154	28	5.8139	35
12.575	101	7.4374	72	0.72353	53	-1.4252	74	6.0572	128	91.432	22	5.8254	36
12.625	99	7.5273	70	0.73323	56	-1.3752	71	6.0793	101	92.71	22	5.8369	30
12.675	99	7.6172	76	0.74292	66	-1.3252	78	6.1013	109	93.988	18	5.8483	27
12.725	100	7.7071	80	0.75262	59	-1.2752	67	6.1233	83	95.266	28	5.8598	45
12.775	100	7.797	80	0.76232	50	-1.2252	70	6.1454	96	96.544	29	5.8713	34
12.825	100	7.8869	74	0.77202	48	-1.1752	77	6.1674	94	97.822	21	5.8827	37
12.875	100	7.9767	68	0.78172	53	-1.1252	84	6.1894	68	99.1	21	5.8942	46
12.925	100	8.0666	72	0.79142	55	-1.0752	77	6.2115	86	100.38	36	5.9057	32
12.975	100	8.1565	77	0.80111	59	-1.0252	75	6.2335	80	101.66	24	5.9171	43
13.025	100	8.2464	76	0.81081	53	-0.97525	87	6.2555	83	102.93	35	5.9286	49
13.075	100	8.3363	70	0.82051	53	-0.92526	88	6.2775	70	104.21	39	5.9401	44
13.125	100	8.4262	76	0.83021	64	-0.87526	78	6.2996	89	105.49	31	5.9515	36
13.175	100	8.5161	79	0.83991	54	-0.82527	86	6.3216	62	106.77	33	5.963	49
13.225	100	8.606	83	0.84961	61	-0.77527	87	6.3436	77	108.05	35	5.9745	53
13.275	100	8.6959	79	0.8593	55	-0.72527	86	6.3657	70	109.32	150	5.986	64
13.325	100	8.7858	72	0.869	52	-0.67528	92	6.3877	65	110.6	368	5.9974	45
13.375	100	8.8757	80	0.8787	50	-0.62528	90	6.4097	73	111.88	439	6.0089	66
13.425	100	8.9656	78	0.8884	53	-0.57529	92	6.4318	81	113.16	435	6.0204	59
13.475	100	9.0555	78	0.8981	54	-0.52529	93	6.4538	80	114.44	488	6.0318	65
13.525	100	9.1454	86	0.9078	48	-0.4753	95	6.4758	85	115.71	489	6.0433	45
13.575	100	9.2353	78	0.91749	48	-0.4253	94	6.4979	86	116.99	478	6.0548	59
13.625	99	9.3251	76	0.92719	53	-0.37531	96	6.5199	108	118.27	464	6.0662	54
13.675	101	9.415	84	0.93689	41	-0.32531	92	6.5419	124	119.55	426	6.0777	78
13.725	100	9.5049	78	0.94659	44	-0.27532	98	6.564	112	120.82	382	6.0892	62
13.775	100	9.5948	80	0.95629	48	-0.22532	98	6.586	102	122.1	343	6.1006	53
13.825	100	9.6847	73	0.96599	57	-0.17533	97	6.608	128	123.38	329	6.1121	69
13.875	100	9.7746	81	0.97568	55	-0.12533	97	6.63	113	124.66	412	6.1236	51
13.925	100	9.8645	86	0.98538	64	-0.075338	98	6.6521	108	125.94	612	6.135	74
13.975	100	9.9544	81	0.99508	43	-0.025342	101	6.6741	142	127.21	342	6.1465	63

## Sheet: MTL10m_NonExplosive
Log10 BND (Nd)	Frequency	Tortuosity factor (m)	Frequency	Throat-pore ratio (ftb)	Frequency	Log10 Friction coefficient (f0)	Frequency	Log10 MER (kg/s)	Frequency	Exit velocity (m/s)	Frequency	Log10 Exit pressure (Pa)	Frequency
9.0254	53	1.055	2	0.034943	0	-4.9749	32	4.493	2	0.69721	2550	5.0111	2550
9.0754	59	1.1449	2	0.044641	0	-4.9249	36	4.5151	1	1.9752	0	5.0226	0
9.1254	55	1.2348	1	0.05434	0	-4.8749	37	4.5371	3	3.2531	0	5.034	0
9.1754	62	1.3247	1	0.064038	0	-4.8249	34	4.5591	8	4.5311	0	5.0455	0
9.2254	62	1.4145	3	0.073737	2	-4.7749	38	4.5812	16	5.809	0	5.057	0
9.2754	66	1.5044	1	0.083435	1	-4.7249	42	4.6032	12	7.087	0	5.0684	0
9.3253	61	1.5943	5	0.093133	3	-4.6749	38	4.6252	17	8.3649	0	5.0799	0
9.3753	59	1.6842	11	0.10283	5	-4.6249	32	4.6472	28	9.6429	0	5.0914	0
9.4253	62	1.7741	8	0.11253	1	-4.5749	34	4.6693	36	10.921	0	5.1028	0
9.4753	54	1.864	12	0.12223	7	-4.5249	27	4.6913	69	12.199	0	5.1143	0
9.5253	52	1.9539	23	0.13193	5	-4.4749	39	4.7133	97	13.477	0	5.1258	0
9.5753	55	2.0438	24	0.14163	6	-4.4249	32	4.7354	160	14.755	0	5.1373	0
9.6253	52	2.1337	13	0.15132	8	-4.3749	31	4.7574	363	16.033	0	5.1487	0
9.6753	57	2.2236	17	0.16102	10	-4.3249	31	4.7794	813	17.311	0	5.1602	0
9.7253	49	2.3135	19	0.17072	9	-4.2749	31	4.8015	732	18.589	0	5.1717	0
9.7753	51	2.4034	24	0.18042	8	-4.2249	32	4.8235	193	19.867	0	5.1831	0
9.8253	59	2.4933	27	0.19012	11	-4.1749	32	4.8455	0	21.144	0	5.1946	0
9.8753	60	2.5832	29	0.19982	17	-4.1249	42	4.8676	0	22.422	0	5.2061	0
9.9253	56	2.673	27	0.20951	12	-4.075	30	4.8896	0	23.7	0	5.2175	0
9.9753	56	2.7629	30	0.21921	20	-4.025	39	4.9116	0	24.978	0	5.229	0
10.025	55	2.8528	32	0.22891	7	-3.975	33	4.9337	0	26.256	0	5.2405	0
10.075	54	2.9427	32	0.23861	15	-3.925	31	4.9557	0	27.534	0	5.2519	0
10.125	47	3.0326	41	0.24831	23	-3.875	36	4.9777	0	28.812	0	5.2634	0
10.175	46	3.1225	37	0.25801	11	-3.825	36	4.9997	0	30.09	0	5.2749	0
10.225	54	3.2124	19	0.2677	16	-3.775	31	5.0218	0	31.368	0	5.2864	0
10.275	51	3.3023	30	0.2774	15	-3.725	22	5.0438	0	32.646	0	5.2978	0
10.325	49	3.3922	31	0.2871	14	-3.675	42	5.0658	0	33.924	0	5.3093	0
10.375	41	3.4821	34	0.2968	21	-3.625	31	5.0879	0	35.202	0	5.3208	0
10.425	47	3.572	41	0.3065	15	-3.575	42	5.1099	0	36.48	0	5.3322	0
10.475	53	3.6619	37	0.3162	19	-3.525	29	5.1319	0	37.758	0	5.3437	0
10.525	43	3.7518	36	0.32589	21	-3.475	29	5.154	0	39.036	0	5.3552	0
10.575	46	3.8417	36	0.33559	18	-3.425	30	5.176	0	40.314	0	5.3666	0
10.625	49	3.9316	37	0.34529	29	-3.375	33	5.198	0	41.592	0	5.3781	0
10.675	41	4.0214	30	0.35499	24	-3.325	36	5.2201	0	42.87	0	5.3896	0
10.725	47	4.1113	40	0.36469	34	-3.275	36	5.2421	0	44.148	0	5.401	0
10.775	44	4.2012	33	0.37439	26	-3.225	41	5.2641	0	45.426	0	5.4125	0
10.825	35	4.2911	39	0.38408	23	-3.175	27	5.2862	0	46.704	0	5.424	0
10.875	32	4.381	42	0.39378	22	-3.125	35	5.3082	0	47.982	0	5.4354	0
10.925	27	4.4709	30	0.40348	28	-3.075	40	5.3302	0	49.26	0	5.4469	0
10.975	45	4.5608	40	0.41318	18	-3.0251	39	5.3522	0	50.537	0	5.4584	0
11.025	44	4.6507	37	0.42288	21	-2.9751	30	5.3743	0	51.815	0	5.4699	0
11.075	33	4.7406	32	0.43258	22	-2.9251	34	5.3963	0	53.093	0	5.4813	0
11.125	38	4.8305	30	0.44227	28	-2.8751	41	5.4183	0	54.371	0	5.4928	0
11.175	32	4.9204	35	0.45197	24	-2.8251	39	5.4404	0	55.649	0	5.5043	0
11.225	29	5.0103	28	0.46167	28	-2.7751	40	5.4624	0	56.927	0	5.5157	0
11.275	30	5.1002	30	0.47137	30	-2.7251	34	5.4844	0	58.205	0	5.5272	0
11.325	28	5.1901	30	0.48107	25	-2.6751	36	5.5065	0	59.483	0	5.5387	0
11.375	25	5.28	33	0.49077	28	-2.6251	30	5.5285	0	60.761	0	5.5501	0
11.425	28	5.3698	25	0.50046	31	-2.5751	24	5.5505	0	62.039	0	5.5616	0
11.475	23	5.4597	42	0.51016	31	-2.5251	31	5.5726	0	63.317	0	5.5731	0
11.525	30	5.5496	30	0.51986	34	-2.4751	27	5.5946	0	64.595	0	5.5845	0
11.575	26	5.6395	29	0.52956	28	-2.4251	26	5.6166	0	65.873	0	5.596	0
11.625	21	5.7294	28	0.53926	20	-2.3751	28	5.6386	0	67.151	0	5.6075	0
11.675	14	5.8193	36	0.54896	24	-2.3251	31	5.6607	0	68.429	0	5.6189	0
11.725	13	5.9092	32	0.55866	35	-2.2751	30	5.6827	0	69.707	0	5.6304	0
11.775	16	5.9991	32	0.56835	34	-2.2251	30	5.7047	0	70.985	0	5.6419	0
11.825	11	6.089	24	0.57805	37	-2.1751	35	5.7268	0	72.263	0	5.6534	0
11.875	9	6.1789	36	0.58775	35	-2.1251	35	5.7488	0	73.541	0	5.6648	0
11.925	7	6.2688	25	0.59745	37	-2.0751	40	5.7708	0	74.819	0	5.6763	0
11.975	9	6.3587	22	0.60715	32	-2.0251	33	5.7929	0	76.097	0	5.6878	0
12.025	10	6.4486	28	0.61685	33	-1.9752	32	5.8149	0	77.375	0	5.6992	0
12.075	6	6.5385	24	0.62654	38	-1.9252	31	5.8369	0	78.652	0	5.7107	0
12.125	7	6.6284	37	0.63624	31	-1.8752	24	5.859	0	79.93	0	5.7222	0
12.175	6	6.7182	35	0.64594	40	-1.8252	32	5.881	0	81.208	0	5.7336	0
12.225	2	6.8081	31	0.65564	30	-1.7752	28	5.903	0	82.486	0	5.7451	0
12.275	4	6.898	26	0.66534	41	-1.7252	30	5.9251	0	83.764	0	5.7566	0
12.325	3	6.9879	25	0.67504	38	-1.6752	27	5.9471	0	85.042	0	5.768	0
12.375	0	7.0778	27	0.68473	42	-1.6252	23	5.9691	0	86.32	0	5.7795	0
12.425	0	7.1677	19	0.69443	35	-1.5752	23	5.9911	0	87.598	0	5.791	0
12.475	0	7.2576	25	0.70413	23	-1.5252	21	6.0132	0	88.876	0	5.8024	0
12.525	0	7.3475	25	0.71383	41	-1.4752	18	6.0352	0	90.154	0	5.8139	0
12.575	0	7.4374	27	0.72353	39	-1.4252	20	6.0572	0	91.432	0	5.8254	0
12.625	0	7.5273	31	0.73323	41	-1.3752	23	6.0793	0	92.71	0	5.8369	0
12.675	0	7.6172	23	0.74292	30	-1.3252	16	6.1013	0	93.988	0	5.8483	0
12.725	0	7.7071	20	0.75262	35	-1.2752	18	6.1233	0	95.266	0	5.8598	0
12.775	0	7.797	20	0.76232	38	-1.2252	20	6.1454	0	96.544	0	5.8713	0
12.825	0	7.8869	27	0.77202	40	-1.1752	16	6.1674	0	97.822	0	5.8827	0
12.875	0	7.9767	31	0.78172	39	-1.1252	15	6.1894	0	99.1	0	5.8942	0
12.925	0	8.0666	28	0.79142	39	-1.0752	16	6.2115	0	100.38	0	5.9057	0
12.975	0	8.1565	24	0.80111	34	-1.0252	18	6.2335	0	101.66	0	5.9171	0
13.025	0	8.2464	24	0.81081	32	-0.97525	8	6.2555	0	102.93	0	5.9286	0
13.075	0	8.3363	29	0.82051	31	-0.92526	9	6.2775	0	104.21	0	5.9401	0
13.125	0	8.4262	24	0.83021	28	-0.87526	15	6.2996	0	105.49	0	5.9515	0
13.175	0	8.5161	22	0.83991	36	-0.82527	7	6.3216	0	106.77	0	5.963	0
13.225	0	8.606	17	0.84961	28	-0.77527	7	6.3436	0	108.05	0	5.9745	0
13.275	0	8.6959	20	0.8593	30	-0.72527	10	6.3657	0	109.32	0	5.986	0
13.325	0	8.7858	28	0.869	36	-0.67528	3	6.3877	0	110.6	0	5.9974	0
13.375	0	8.8757	20	0.8787	40	-0.62528	4	6.4097	0	111.88	0	6.0089	0
13.425	0	8.9656	22	0.8884	34	-0.57529	5	6.4318	0	113.16	0	6.0204	0
13.475	0	9.0555	22	0.8981	34	-0.52529	1	6.4538	0	114.44	0	6.0318	0
13.525	0	9.1454	15	0.9078	46	-0.4753	1	6.4758	0	115.71	0	6.0433	0
13.575	0	9.2353	22	0.91749	34	-0.4253	1	6.4979	0	116.99	0	6.0548	0
13.625	0	9.3251	24	0.92719	37	-0.37531	0	6.5199	0	118.27	0	6.0662	0
13.675	0	9.415	16	0.93689	46	-0.32531	4	6.5419	0	119.55	0	6.0777	0
13.725	0	9.5049	22	0.94659	50	-0.27532	1	6.564	0	120.82	0	6.0892	0
13.775	0	9.5948	19	0.95629	38	-0.22532	0	6.586	0	122.1	0	6.1006	0
13.825	0	9.6847	27	0.96599	31	-0.17533	1	6.608	0	123.38	0	6.1121	0
13.875	0	9.7746	19	0.97568	34	-0.12533	0	6.63	0	124.66	0	6.1236	0
13.925	0	9.8645	14	0.98538	26	-0.075338	0	6.6521	0	125.94	0	6.135	0
13.975	0	9.9544	19	0.99508	44	-0.025342	0	6.6741	0	127.21	0	6.1465	0

## Sheet: MTL5m_Explosive
Log10 BND (Nd)	Frequency	Tortuosity factor (m)	Frequency	Throat-pore ratio (ftb)	Frequency	Log10 Friction coefficient (f0)	Frequency	Log10 MER (kg/s)	Frequency	Exit velocity (m/s)	Frequency	Log10 Exit pressure (Pa)	Frequency
9.0254	12	1.055	26	0.034943	101	-4.9749	43	3.3985	0	0.65278	0	5.0108	721
9.0754	5	1.1449	38	0.044641	98	-4.9249	44	3.4247	0	1.9194	0	5.0214	77
9.1254	9	1.2348	45	0.05434	95	-4.8749	40	3.4508	0	3.1859	0	5.0321	87
9.1754	9	1.3247	32	0.064038	96	-4.8249	43	3.477	0	4.4525	0	5.0427	90
9.2254	11	1.4145	42	0.073737	91	-4.7749	45	3.5031	0	5.7191	0	5.0533	98
9.2754	9	1.5044	39	0.083435	91	-4.7249	39	3.5293	0	6.9856	0	5.0639	97
9.3253	11	1.5943	36	0.093133	87	-4.6749	41	3.5555	0	8.2522	0	5.0745	84
9.3753	5	1.6842	42	0.10283	89	-4.6249	41	3.5816	0	9.5188	0	5.0852	79
9.4253	8	1.7741	33	0.11253	86	-4.5749	50	3.6078	0	10.785	0	5.0958	99
9.4753	14	1.864	44	0.12223	81	-4.5249	46	3.6339	0	12.052	0	5.1064	77
9.5253	14	1.9539	36	0.13193	74	-4.4749	34	3.6601	0	13.318	0	5.117	77
9.5753	18	2.0438	36	0.14163	74	-4.4249	52	3.6862	0	14.585	0	5.1276	71
9.6253	15	2.1337	45	0.15132	77	-4.3749	44	3.7124	0	15.852	0	5.1383	95
9.6753	13	2.2236	35	0.16102	69	-4.3249	43	3.7386	0	17.118	0	5.1489	68
9.7253	22	2.3135	42	0.17072	72	-4.2749	35	3.7647	0	18.385	0	5.1595	80
9.7753	23	2.4034	44	0.18042	81	-4.2249	46	3.7909	0	19.651	0	5.1701	81
9.8253	17	2.4933	42	0.19012	70	-4.1749	47	3.817	0	20.918	0	5.1807	73
9.8753	18	2.5832	38	0.19982	62	-4.1249	43	3.8432	0	22.184	0	5.1914	83
9.9253	15	2.673	41	0.20951	72	-4.075	41	3.8693	0	23.451	0	5.202	68
9.9753	16	2.7629	41	0.21921	66	-4.025	43	3.8955	0	24.718	0	5.2126	79
10.025	16	2.8528	40	0.22891	74	-3.975	48	3.9217	0	25.984	0	5.2232	86
10.075	17	2.9427	43	0.23861	68	-3.925	44	3.9478	0	27.251	0	5.2338	81
10.125	15	3.0326	39	0.24831	60	-3.875	48	3.974	0	28.517	0	5.2445	65
10.175	26	3.1225	44	0.25801	65	-3.825	42	4.0001	0	29.784	0	5.2551	66
10.225	17	3.2124	50	0.2677	60	-3.775	43	4.0263	0	31.05	0	5.2657	75
10.275	21	3.3023	51	0.2774	65	-3.725	46	4.0524	0	32.317	0	5.2763	65
10.325	26	3.3922	52	0.2871	63	-3.675	40	4.0786	0	33.584	0	5.2869	70
10.375	29	3.4821	43	0.2968	59	-3.625	46	4.1047	0	34.85	0	5.2976	46
10.425	24	3.572	41	0.3065	62	-3.575	35	4.1309	0	36.117	0	5.3082	65
10.475	22	3.6619	45	0.3162	67	-3.525	51	4.1571	0	37.383	0	5.3188	60
10.525	30	3.7518	46	0.32589	59	-3.475	45	4.1832	0	38.65	0	5.3294	42
10.575	21	3.8417	41	0.33559	56	-3.425	45	4.2094	0	39.916	0	5.34	62
10.625	21	3.9316	50	0.34529	48	-3.375	42	4.2355	0	41.183	0	5.3507	61
10.675	26	4.0214	55	0.35499	47	-3.325	45	4.2617	0	42.45	0	5.3613	51
10.725	27	4.1113	44	0.36469	47	-3.275	34	4.2878	0	43.716	0	5.3719	56
10.775	25	4.2012	48	0.37439	42	-3.225	36	4.314	0	44.983	0	5.3825	48
10.825	29	4.2911	51	0.38408	58	-3.175	53	4.3402	0	46.249	0	5.3931	44
10.875	37	4.381	38	0.39378	61	-3.125	47	4.3663	0	47.516	0	5.4038	54
10.925	32	4.4709	59	0.40348	50	-3.075	35	4.3925	0	48.782	0	5.4144	36
10.975	26	4.5608	47	0.41318	72	-3.0251	38	4.4186	0	50.049	0	5.425	38
11.025	25	4.6507	45	0.42288	52	-2.9751	38	4.4448	0	51.316	0	5.4356	63
11.075	36	4.7406	54	0.43258	54	-2.9251	41	4.4709	0	52.582	0	5.4462	45
11.125	31	4.8305	54	0.44227	52	-2.8751	39	4.4971	0	53.849	0	5.4569	39
11.175	44	4.9204	48	0.45197	48	-2.8251	39	4.5233	0	55.115	0	5.4675	34
11.225	44	5.0103	56	0.46167	54	-2.7751	39	4.5494	0	56.382	0	5.4781	27
11.275	39	5.1002	58	0.47137	45	-2.7251	49	4.5756	0	57.648	0	5.4887	45
11.325	40	5.1901	57	0.48107	44	-2.6751	38	4.6017	0	58.915	0	5.4993	34
11.375	49	5.28	49	0.49077	51	-2.6251	51	4.6279	0	60.182	1	5.51	32
11.425	47	5.3698	50	0.50046	44	-2.5751	48	4.654	0	61.448	0	5.5206	45
11.475	39	5.4597	48	0.51016	37	-2.5251	50	4.6802	0	62.715	0	5.5312	33
11.525	36	5.5496	52	0.51986	43	-2.4751	45	4.7064	0	63.981	0	5.5418	28
11.575	32	5.6395	51	0.52956	51	-2.4251	41	4.7325	1	65.248	1	5.5524	26
11.625	47	5.7294	49	0.53926	58	-2.3751	42	4.7587	4	66.514	0	5.5631	22
11.675	45	5.8193	47	0.54896	56	-2.3251	52	4.7848	10	67.781	3	5.5737	26
11.725	48	5.9092	50	0.55866	47	-2.2751	41	4.811	27	69.047	1	5.5843	28
11.775	56	5.9991	57	0.56835	32	-2.2251	42	4.8371	40	70.314	4	5.5949	26
11.825	46	6.089	57	0.57805	36	-2.1751	50	4.8633	73	71.581	1	5.6055	24
11.875	47	6.1789	49	0.58775	41	-2.1251	47	4.8895	103	72.847	3	5.6162	26
11.925	62	6.2688	58	0.59745	39	-2.0751	38	4.9156	100	74.114	5	5.6268	28
11.975	69	6.3587	56	0.60715	38	-2.0251	43	4.9418	116	75.38	4	5.6374	23
12.025	61	6.4486	55	0.61685	39	-1.9752	40	4.9679	144	76.647	7	5.648	28
12.075	60	6.5385	55	0.62654	37	-1.9252	42	4.9941	234	77.913	11	5.6586	22
12.125	66	6.6284	48	0.63624	43	-1.8752	53	5.0202	245	79.18	5	5.6692	18
12.175	69	6.7182	46	0.64594	38	-1.8252	41	5.0464	237	80.447	7	5.6799	26
12.225	67	6.8081	51	0.65564	40	-1.7752	45	5.0726	218	81.713	16	5.6905	33
12.275	65	6.898	60	0.66534	36	-1.7252	50	5.0987	215	82.98	12	5.7011	20
12.325	73	6.9879	60	0.67504	40	-1.6752	46	5.1249	212	84.246	11	5.7117	41
12.375	73	7.0778	60	0.68473	35	-1.6252	62	5.151	201	85.513	20	5.7223	28
12.425	73	7.1677	60	0.69443	42	-1.5752	49	5.1772	207	86.779	20	5.733	19
12.475	76	7.2576	55	0.70413	47	-1.5252	53	5.2033	188	88.046	16	5.7436	27
12.525	81	7.3475	56	0.71383	35	-1.4752	51	5.2295	178	89.313	22	5.7542	23
12.575	82	7.4374	61	0.72353	34	-1.4252	54	5.2557	161	90.579	20	5.7648	17
12.625	83	7.5273	59	0.73323	35	-1.3752	49	5.2818	137	91.846	33	5.7754	27
12.675	84	7.6172	58	0.74292	50	-1.3252	53	5.308	149	93.112	27	5.7861	29
12.725	83	7.7071	61	0.75262	39	-1.2752	48	5.3341	123	94.379	23	5.7967	22
12.775	88	7.797	68	0.76232	33	-1.2252	44	5.3603	112	95.645	22	5.8073	20
12.825	90	7.8869	57	0.77202	26	-1.1752	54	5.3864	133	96.912	26	5.8179	25
12.875	94	7.9767	52	0.78172	28	-1.1252	58	5.4126	88	98.179	27	5.8285	24
12.925	95	8.0666	60	0.79142	33	-1.0752	58	5.4387	95	99.445	27	5.8392	24
12.975	88	8.1565	64	0.80111	42	-1.0252	57	5.4649	96	100.71	31	5.8498	26
13.025	91	8.2464	64	0.81081	37	-0.97525	56	5.4911	69	101.98	25	5.8604	19
13.075	98	8.3363	53	0.82051	31	-0.92526	71	5.5172	68	103.24	34	5.871	29
13.125	93	8.4262	51	0.83021	41	-0.87526	59	5.5434	61	104.51	31	5.8816	26
13.175	96	8.5161	60	0.83991	38	-0.82527	68	5.5695	67	105.78	31	5.8923	24
13.225	97	8.606	62	0.84961	42	-0.77527	68	5.5957	60	107.04	28	5.9029	27
13.275	98	8.6959	64	0.8593	39	-0.72527	67	5.6218	68	108.31	36	5.9135	30
13.325	99	8.7858	56	0.869	28	-0.67528	70	5.648	78	109.58	172	5.9241	27
13.375	99	8.8757	64	0.8787	30	-0.62528	72	5.6742	59	110.84	477	5.9347	31
13.425	99	8.9656	58	0.8884	35	-0.57529	78	5.7003	51	112.11	442	5.9454	36
13.475	100	9.0555	60	0.8981	33	-0.52529	77	5.7265	65	113.38	457	5.956	12
13.525	100	9.1454	72	0.9078	31	-0.4753	78	5.7526	62	114.64	450	5.9666	34
13.575	100	9.2353	67	0.91749	32	-0.4253	79	5.7788	61	115.91	409	5.9772	25
13.625	99	9.3251	67	0.92719	33	-0.37531	87	5.8049	62	117.18	355	5.9878	23
13.675	101	9.415	68	0.93689	25	-0.32531	74	5.8311	62	118.44	318	5.9985	26
13.725	100	9.5049	63	0.94659	25	-0.27532	93	5.8573	76	119.71	256	6.0091	23
13.775	100	9.5948	62	0.95629	33	-0.22532	87	5.8834	58	120.98	236	6.0197	37
13.825	99	9.6847	65	0.96599	36	-0.17533	88	5.9096	70	122.24	233	6.0303	26
13.875	100	9.7746	66	0.97568	26	-0.12533	92	5.9357	62	123.51	255	6.0409	26
13.925	100	9.8645	69	0.98538	40	-0.075338	93	5.9619	73	124.78	254	6.0516	33
13.975	100	9.9544	67	0.99508	29	-0.025342	93	5.988	74	126.04	248	6.0622	31

## Sheet: MTL5m_NonExplosive
Log10 BND (Nd)	Frequency	Tortuosity factor (m)	Frequency	Throat-pore ratio (ftb)	Frequency	Log10 Friction coefficient (f0)	Frequency	Log10 MER (kg/s)	Frequency	Exit velocity (m/s)	Frequency	Log10 Exit pressure (Pa)	Frequency
9.0254	53	1.055	0	0.034943	0	-4.9749	38	3.3985	3	0.65278	3051	5.0108	3051
9.0754	48	1.1449	0	0.044641	1	-4.9249	38	3.4247	1	1.9194	0	5.0214	0
9.1254	45	1.2348	0	0.05434	4	-4.8749	44	3.4508	4	3.1859	0	5.0321	0
9.1754	47	1.3247	0	0.064038	3	-4.8249	39	3.477	3	4.4525	0	5.0427	0
9.2254	54	1.4145	0	0.073737	6	-4.7749	42	3.5031	8	5.7191	0	5.0533	0
9.2754	59	1.5044	0	0.083435	7	-4.7249	40	3.5293	51	6.9856	0	5.0639	0
9.3253	56	1.5943	0	0.093133	9	-4.6749	43	3.5555	474	8.2522	0	5.0745	0
9.3753	57	1.6842	0	0.10283	9	-4.6249	38	3.5816	1241	9.5188	0	5.0852	0
9.4253	52	1.7741	0	0.11253	7	-4.5749	33	3.6078	1158	10.785	0	5.0958	0
9.4753	48	1.864	0	0.12223	11	-4.5249	33	3.6339	108	12.052	0	5.1064	0
9.5253	47	1.9539	0	0.13193	18	-4.4749	45	3.6601	0	13.318	0	5.117	0
9.5753	50	2.0438	1	0.14163	18	-4.4249	27	3.6862	0	14.585	0	5.1276	0
9.6253	48	2.1337	1	0.15132	12	-4.3749	39	3.7124	0	15.852	0	5.1383	0
9.6753	44	2.2236	6	0.16102	24	-4.3249	32	3.7386	0	17.118	0	5.1489	0
9.7253	47	2.3135	8	0.17072	20	-4.2749	48	3.7647	0	18.385	0	5.1595	0
9.7753	42	2.4034	4	0.18042	10	-4.2249	40	3.7909	0	19.651	0	5.1701	0
9.8253	52	2.4933	4	0.19012	20	-4.1749	35	3.817	0	20.918	0	5.1807	0
9.8753	55	2.5832	12	0.19982	30	-4.1249	37	3.8432	0	22.184	0	5.1914	0
9.9253	56	2.673	11	0.20951	19	-4.075	37	3.8693	0	23.451	0	5.202	0
9.9753	55	2.7629	11	0.21921	24	-4.025	34	3.8955	0	24.718	0	5.2126	0
10.025	41	2.8528	15	0.22891	16	-3.975	36	3.9217	0	25.984	0	5.2232	0
10.075	52	2.9427	14	0.23861	20	-3.925	37	3.9478	0	27.251	0	5.2338	0
10.125	54	3.0326	20	0.24831	27	-3.875	32	3.974	0	28.517	0	5.2445	0
10.175	52	3.1225	20	0.25801	19	-3.825	46	4.0001	0	29.784	0	5.2551	0
10.225	49	3.2124	23	0.2677	23	-3.775	35	4.0263	0	31.05	0	5.2657	0
10.275	44	3.3023	18	0.2774	25	-3.725	30	4.0524	0	32.317	0	5.2763	0
10.325	47	3.3922	24	0.2871	26	-3.675	37	4.0786	0	33.584	0	5.2869	0
10.375	46	3.4821	25	0.2968	28	-3.625	36	4.1047	0	34.85	0	5.2976	0
10.425	46	3.572	26	0.3065	21	-3.575	43	4.1309	0	36.117	0	5.3082	0
10.475	45	3.6619	23	0.3162	22	-3.525	31	4.1571	0	37.383	0	5.3188	0
10.525	42	3.7518	31	0.32589	31	-3.475	30	4.1832	0	38.65	0	5.3294	0
10.575	49	3.8417	28	0.33559	23	-3.425	32	4.2094	0	39.916	0	5.34	0
10.625	49	3.9316	27	0.34529	33	-3.375	35	4.2355	0	41.183	0	5.3507	0
10.675	45	4.0214	32	0.35499	35	-3.325	42	4.2617	0	42.45	0	5.3613	0
10.725	47	4.1113	31	0.36469	34	-3.275	41	4.2878	0	43.716	0	5.3719	0
10.775	49	4.2012	34	0.37439	33	-3.225	44	4.314	0	44.983	0	5.3825	0
10.825	44	4.2911	33	0.38408	29	-3.175	36	4.3402	0	46.249	0	5.3931	0
10.875	38	4.381	41	0.39378	23	-3.125	34	4.3663	0	47.516	0	5.4038	0
10.925	43	4.4709	28	0.40348	37	-3.075	36	4.3925	0	48.782	0	5.4144	0
10.975	52	4.5608	34	0.41318	20	-3.0251	39	4.4186	0	50.049	0	5.425	0
11.025	52	4.6507	37	0.42288	29	-2.9751	41	4.4448	0	51.316	0	5.4356	0
11.075	44	4.7406	33	0.43258	24	-2.9251	37	4.4709	0	52.582	0	5.4462	0
11.125	53	4.8305	36	0.44227	27	-2.8751	45	4.4971	0	53.849	0	5.4569	0
11.175	40	4.9204	46	0.45197	36	-2.8251	43	4.5233	0	55.115	0	5.4675	0
11.225	41	5.0103	40	0.46167	29	-2.7751	42	4.5494	0	56.382	0	5.4781	0
11.275	43	5.1002	39	0.47137	35	-2.7251	29	4.5756	0	57.648	0	5.4887	0
11.325	43	5.1901	38	0.48107	35	-2.6751	45	4.6017	0	58.915	0	5.4993	0
11.375	34	5.28	49	0.49077	32	-2.6251	34	4.6279	0	60.182	0	5.51	0
11.425	43	5.3698	48	0.50046	36	-2.5751	37	4.654	0	61.448	0	5.5206	0
11.475	42	5.4597	47	0.51016	43	-2.5251	32	4.6802	0	62.715	0	5.5312	0
11.525	38	5.5496	47	0.51986	37	-2.4751	34	4.7064	0	63.981	0	5.5418	0
11.575	52	5.6395	44	0.52956	35	-2.4251	35	4.7325	0	65.248	0	5.5524	0
11.625	38	5.7294	48	0.53926	28	-2.3751	33	4.7587	0	66.514	0	5.5631	0
11.675	41	5.8193	49	0.54896	29	-2.3251	30	4.7848	0	67.781	0	5.5737	0
11.725	33	5.9092	50	0.55866	32	-2.2751	45	4.811	0	69.047	0	5.5843	0
11.775	34	5.9991	43	0.56835	46	-2.2251	32	4.8371	0	70.314	0	5.5949	0
11.825	39	6.089	42	0.57805	38	-2.1751	38	4.8633	0	71.581	0	5.6055	0
11.875	33	6.1789	49	0.58775	32	-2.1251	40	4.8895	0	72.847	0	5.6162	0
11.925	32	6.2688	43	0.59745	38	-2.0751	40	4.9156	0	74.114	0	5.6268	0
11.975	21	6.3587	44	0.60715	40	-2.0251	35	4.9418	0	75.38	0	5.6374	0
12.025	29	6.4486	45	0.61685	30	-1.9752	38	4.9679	0	76.647	0	5.648	0
12.075	26	6.5385	45	0.62654	47	-1.9252	39	4.9941	0	77.913	0	5.6586	0
12.125	23	6.6284	52	0.63624	32	-1.8752	30	5.0202	0	79.18	0	5.6692	0
12.175	19	6.7182	54	0.64594	42	-1.8252	41	5.0464	0	80.447	0	5.6799	0
12.225	22	6.8081	48	0.65564	44	-1.7752	36	5.0726	0	81.713	0	5.6905	0
12.275	22	6.898	41	0.66534	41	-1.7252	38	5.0987	0	82.98	0	5.7011	0
12.325	20	6.9879	40	0.67504	32	-1.6752	32	5.1249	0	84.246	0	5.7117	0
12.375	20	7.0778	39	0.68473	43	-1.6252	27	5.151	0	85.513	0	5.7223	0
12.425	19	7.1677	41	0.69443	40	-1.5752	32	5.1772	0	86.779	0	5.733	0
12.475	16	7.2576	45	0.70413	26	-1.5252	31	5.2033	0	88.046	0	5.7436	0
12.525	13	7.3475	44	0.71383	44	-1.4752	39	5.2295	0	89.313	0	5.7542	0
12.575	14	7.4374	38	0.72353	46	-1.4252	31	5.2557	0	90.579	0	5.7648	0
12.625	10	7.5273	41	0.73323	53	-1.3752	25	5.2818	0	91.846	0	5.7754	0
12.675	9	7.6172	41	0.74292	37	-1.3252	31	5.308	0	93.112	0	5.7861	0
12.725	13	7.7071	39	0.75262	43	-1.2752	23	5.3341	0	94.379	0	5.7967	0
12.775	5	7.797	32	0.76232	37	-1.2252	28	5.3603	0	95.645	0	5.8073	0
12.825	3	7.8869	44	0.77202	37	-1.1752	23	5.3864	0	96.912	0	5.8179	0
12.875	2	7.9767	47	0.78172	49	-1.1252	26	5.4126	0	98.179	0	5.8285	0
12.925	3	8.0666	40	0.79142	44	-1.0752	21	5.4387	0	99.445	0	5.8392	0
12.975	7	8.1565	37	0.80111	31	-1.0252	25	5.4649	0	100.71	0	5.8498	0
13.025	4	8.2464	36	0.81081	38	-0.97525	24	5.4911	0	101.98	0	5.8604	0
13.075	1	8.3363	46	0.82051	36	-0.92526	14	5.5172	0	103.24	0	5.871	0
13.125	3	8.4262	49	0.83021	37	-0.87526	24	5.5434	0	104.51	0	5.8816	0
13.175	2	8.5161	41	0.83991	38	-0.82527	17	5.5695	0	105.78	0	5.8923	0
13.225	1	8.606	37	0.84961	31	-0.77527	13	5.5957	0	107.04	0	5.9029	0
13.275	0	8.6959	35	0.8593	32	-0.72527	17	5.6218	0	108.31	0	5.9135	0
13.325	0	8.7858	44	0.869	44	-0.67528	15	5.648	0	109.58	0	5.9241	0
13.375	0	8.8757	36	0.8787	42	-0.62528	8	5.6742	0	110.84	0	5.9347	0
13.425	0	8.9656	42	0.8884	33	-0.57529	7	5.7003	0	112.11	0	5.9454	0
13.475	0	9.0555	40	0.8981	39	-0.52529	5	5.7265	0	113.38	0	5.956	0
13.525	0	9.1454	29	0.9078	48	-0.4753	11	5.7526	0	114.64	0	5.9666	0
13.575	0	9.2353	33	0.91749	38	-0.4253	12	5.7788	0	115.91	0	5.9772	0
13.625	0	9.3251	33	0.92719	45	-0.37531	6	5.8049	0	117.18	0	5.9878	0
13.675	0	9.415	32	0.93689	43	-0.32531	8	5.8311	0	118.44	0	5.9985	0
13.725	0	9.5049	37	0.94659	52	-0.27532	1	5.8573	0	119.71	0	6.0091	0
13.775	0	9.5948	37	0.95629	36	-0.22532	7	5.8834	0	120.98	0	6.0197	0
13.825	0	9.6847	35	0.96599	39	-0.17533	4	5.9096	0	122.24	0	6.0303	0
13.875	0	9.7746	34	0.97568	51	-0.12533	0	5.9357	0	123.51	0	6.0409	0
13.925	0	9.8645	31	0.98538	33	-0.075338	0	5.9619	0	124.78	0	6.0516	0
13.975	0	9.9544	34	0.99508	40	-0.025342	1	5.988	0	126.04	0	6.0622	0
