# Supplementary material for: Outgassing behaviour during highly explosive basaltic eruptions
Source: Springer Nature journal article supplement (doi:10.1038/s43247-023-01182-w), 2024-01-02
Supplement: MOESM7 [file 43247_2023_1182_MOESM7_ESM.xlsx]

## Sheet: Sheet1
Outgassing behaviour during highly explosive basaltic eruptions
Emily C. Bamber, Giuseppe La Spina, Fabio Arzilli, Margherita Polacci, Lucia Mancini, Mattia de' Michieli Vitturi, Daniele Andronico, Rosa Anna Corsaro, Mike R. Burton
Supplementary Data 4
Results of the sensitivity analysis using the Etna 122 BC composition and initial conditions.

## Sheet: Etna122BC_Explosive
Log10 BND (Nd)	Frequency	Tortuosity factor (m)	Frequency	Throat-pore ratio (ftb)	Frequency	Log10 Friction coefficient (f0)	Frequency	Log10 MER (kg/s)	Frequency	Exit velocity (m/s)	Frequency	Log10 Exit pressure (Pa)	Frequency
9.0254	29	1.055	45	0.034943	82	-4.9749	24	7.0097	0	2.4685	0	5.0123	0
9.0754	26	1.1449	57	0.044641	79	-4.9249	31	7.0184	0	3.8287	0	5.0256	0
9.1254	28	1.2348	60	0.05434	79	-4.8749	29	7.0271	0	5.1889	0	5.0388	0
9.1754	30	1.3247	47	0.064038	70	-4.8249	32	7.0358	0	6.549	0	5.0521	0
9.2254	34	1.4145	54	0.073737	76	-4.7749	35	7.0446	0	7.9092	0	5.0654	0
9.2754	25	1.5044	47	0.083435	78	-4.7249	31	7.0533	0	9.2694	0	5.0786	0
9.3253	30	1.5943	47	0.093133	70	-4.6749	30	7.062	0	10.63	0	5.0919	0
9.3753	32	1.6842	55	0.10283	65	-4.6249	24	7.0707	0	11.99	0	5.1051	0
9.4253	33	1.7741	45	0.11253	69	-4.5749	35	7.0794	0	13.35	0	5.1184	0
9.4753	38	1.864	60	0.12223	65	-4.5249	33	7.0881	0	14.71	0	5.1317	0
9.5253	30	1.9539	52	0.13193	64	-4.4749	22	7.0968	0	16.07	0	5.1449	0
9.5753	38	2.0438	51	0.14163	72	-4.4249	44	7.1055	0	17.431	0	5.1582	0
9.6253	38	2.1337	58	0.15132	70	-4.3749	31	7.1142	0	18.791	0	5.1714	0
9.6753	26	2.2236	50	0.16102	64	-4.3249	31	7.1229	0	20.151	0	5.1847	0
9.7253	37	2.3135	50	0.17072	61	-4.2749	25	7.1316	0	21.511	0	5.198	0
9.7753	38	2.4034	56	0.18042	62	-4.2249	33	7.1403	0	22.871	0	5.2112	0
9.8253	29	2.4933	53	0.19012	62	-4.1749	38	7.149	0	24.231	0	5.2245	0
9.8753	35	2.5832	51	0.19982	60	-4.1249	31	7.1577	0	25.592	0	5.2378	0
9.9253	34	2.673	59	0.20951	65	-4.075	27	7.1664	0	26.952	0	5.251	0
9.9753	32	2.7629	57	0.21921	62	-4.025	30	7.1751	0	28.312	0	5.2643	0
10.025	31	2.8528	48	0.22891	63	-3.975	38	7.1838	0	29.672	0	5.2775	0
10.075	36	2.9427	54	0.23861	60	-3.925	30	7.1925	0	31.032	0	5.2908	0
10.125	36	3.0326	46	0.24831	51	-3.875	37	7.2013	0	32.393	0	5.3041	0
10.175	36	3.1225	46	0.25801	70	-3.825	31	7.21	0	33.753	0	5.3173	0
10.225	33	3.2124	65	0.2677	56	-3.775	32	7.2187	0	35.113	0	5.3306	0
10.275	42	3.3023	52	0.2774	60	-3.725	37	7.2274	0	36.473	0	5.3438	0
10.325	39	3.3922	61	0.2871	57	-3.675	31	7.2361	0	37.833	0	5.3571	0
10.375	55	3.4821	50	0.2968	58	-3.625	32	7.2448	0	39.193	0	5.3704	0
10.425	38	3.572	50	0.3065	56	-3.575	24	7.2535	0	40.554	0	5.3836	0
10.475	46	3.6619	59	0.3162	67	-3.525	42	7.2622	0	41.914	0	5.3969	0
10.525	44	3.7518	54	0.32589	62	-3.475	30	7.2709	0	43.274	0	5.4102	0
10.575	45	3.8417	54	0.33559	61	-3.425	36	7.2796	0	44.634	0	5.4234	0
10.625	30	3.9316	54	0.34529	54	-3.375	34	7.2883	0	45.994	0	5.4367	0
10.675	43	4.0214	55	0.35499	52	-3.325	33	7.297	0	47.355	0	5.4499	0
10.725	39	4.1113	55	0.36469	57	-3.275	28	7.3057	0	48.715	0	5.4632	0
10.775	42	4.2012	56	0.37439	58	-3.225	27	7.3144	0	50.075	0	5.4765	0
10.825	46	4.2911	59	0.38408	64	-3.175	38	7.3231	0	51.435	0	5.4897	0
10.875	50	4.381	45	0.39378	59	-3.125	38	7.3318	0	52.795	0	5.503	0
10.925	55	4.4709	58	0.40348	52	-3.075	27	7.3405	0	54.156	0	5.5162	0
10.975	45	4.5608	42	0.41318	71	-3.0251	33	7.3492	0	55.516	0	5.5295	0
11.025	48	4.6507	54	0.42288	63	-2.9751	29	7.358	0	56.876	0	5.5428	0
11.075	58	4.7406	53	0.43258	60	-2.9251	32	7.3667	0	58.236	0	5.556	0
11.125	48	4.8305	52	0.44227	59	-2.8751	33	7.3754	0	59.596	0	5.5693	0
11.175	50	4.9204	51	0.45197	65	-2.8251	33	7.3841	0	60.956	0	5.5826	0
11.225	52	5.0103	59	0.46167	64	-2.7751	28	7.3928	0	62.317	0	5.5958	0
11.275	50	5.1002	64	0.47137	55	-2.7251	42	7.4015	0	63.677	0	5.6091	0
11.325	46	5.1901	59	0.48107	59	-2.6751	35	7.4102	0	65.037	28	5.6223	0
11.375	60	5.28	52	0.49077	55	-2.6251	45	7.4189	0	66.397	52	5.6356	0
11.425	49	5.3698	52	0.50046	53	-2.5751	44	7.4276	2	67.757	93	5.6489	0
11.475	58	5.4597	54	0.51016	50	-2.5251	39	7.4363	8	69.118	114	5.6621	0
11.525	46	5.5496	58	0.51986	52	-2.4751	38	7.445	5	70.478	142	5.6754	0
11.575	46	5.6395	60	0.52956	61	-2.4251	42	7.4537	5	71.838	134	5.6886	0
11.625	53	5.7294	58	0.53926	69	-2.3751	48	7.4624	7	73.198	185	5.7019	0
11.675	57	5.8193	54	0.54896	66	-2.3251	48	7.4711	7	74.558	208	5.7152	8
11.725	62	5.9092	56	0.55866	55	-2.2751	49	7.4798	10	75.918	194	5.7284	56
11.775	57	5.9991	57	0.56835	44	-2.2251	49	7.4885	10	77.279	218	5.7417	144
11.825	54	6.089	60	0.57805	52	-2.1751	49	7.4972	11	78.639	201	5.7549	221
11.875	51	6.1789	58	0.58775	54	-2.1251	47	7.5059	9	79.999	185	5.7682	264
11.925	65	6.2688	63	0.59745	52	-2.0751	45	7.5147	13	81.359	181	5.7815	343
11.975	59	6.3587	63	0.60715	50	-2.0251	53	7.5234	10	82.719	175	5.7947	375
12.025	61	6.4486	56	0.61685	54	-1.9752	58	7.5321	26	84.08	150	5.808	317
12.075	66	6.5385	66	0.62654	49	-1.9252	53	7.5408	32	85.44	179	5.8213	320
12.125	65	6.6284	47	0.63624	53	-1.8752	63	7.5495	51	86.8	155	5.8345	347
12.175	63	6.7182	55	0.64594	49	-1.8252	55	7.5582	113	88.16	147	5.8478	347
12.225	71	6.8081	55	0.65564	58	-1.7752	61	7.5669	247	89.52	136	5.861	263
12.275	75	6.898	51	0.66534	50	-1.7252	69	7.5756	658	90.881	146	5.8743	231
12.325	68	6.9879	64	0.67504	52	-1.6752	70	7.5843	1425	92.241	137	5.8876	212
12.375	73	7.0778	55	0.68473	50	-1.6252	77	7.593	1534	93.601	130	5.9008	180
12.425	69	7.1677	65	0.69443	50	-1.5752	76	7.6017	990	94.961	122	5.9141	170
12.475	75	7.2576	56	0.70413	56	-1.5252	85	7.6104	169	96.321	100	5.9273	173
12.525	78	7.3475	60	0.71383	46	-1.4752	88	7.6191	42	97.681	101	5.9406	176
12.575	79	7.4374	59	0.72353	43	-1.4252	89	7.6278	42	99.042	75	5.9539	175
12.625	74	7.5273	56	0.73323	46	-1.3752	83	7.6365	20	100.4	98	5.9671	149
12.675	79	7.6172	57	0.74292	57	-1.3252	95	7.6452	15	101.76	97	5.9804	171
12.725	77	7.7071	62	0.75262	55	-1.2752	87	7.6539	16	103.12	89	5.9937	162
12.775	81	7.797	64	0.76232	48	-1.2252	88	7.6626	7	104.48	77	6.0069	170
12.825	76	7.8869	63	0.77202	43	-1.1752	91	7.6714	10	105.84	80	6.0202	145
12.875	78	7.9767	51	0.78172	47	-1.1252	96	7.6801	6	107.2	80	6.0334	132
12.925	84	8.0666	62	0.79142	54	-1.0752	98	7.6888	9	108.56	84	6.0467	87
12.975	80	8.1565	69	0.80111	54	-1.0252	93	7.6975	4	109.92	77	6.06	46
13.025	81	8.2464	60	0.81081	44	-0.97525	99	7.7062	4	111.28	65	6.0732	39
13.075	88	8.3363	57	0.82051	51	-0.92526	100	7.7149	10	112.64	66	6.0865	26
13.125	76	8.4262	59	0.83021	56	-0.87526	98	7.7236	2	114	69	6.0997	22
13.175	78	8.5161	62	0.83991	49	-0.82527	101	7.7323	5	115.36	72	6.113	11
13.225	83	8.606	66	0.84961	54	-0.77527	97	7.741	12	116.72	73	6.1263	14
13.275	84	8.6959	64	0.8593	46	-0.72527	98	7.7497	5	118.08	67	6.1395	8
13.325	81	8.7858	49	0.869	36	-0.67528	97	7.7584	5	119.44	70	6.1528	10
13.375	82	8.8757	63	0.8787	39	-0.62528	98	7.7671	1	120.8	62	6.166	10
13.425	82	8.9656	52	0.8884	48	-0.57529	97	7.7758	5	122.16	80	6.1793	5
13.475	75	9.0555	63	0.8981	43	-0.52529	99	7.7845	6	123.52	68	6.1926	10
13.525	83	9.1454	70	0.9078	44	-0.4753	101	7.7932	11	124.89	79	6.2058	11
13.575	76	9.2353	63	0.91749	48	-0.4253	97	7.8019	7	126.25	73	6.2191	6
13.625	80	9.3251	63	0.92719	47	-0.37531	97	7.8106	3	127.61	52	6.2324	6
13.675	82	9.415	65	0.93689	37	-0.32531	96	7.8193	10	128.97	59	6.2456	12
13.725	85	9.5049	58	0.94659	42	-0.27532	96	7.828	8	130.33	56	6.2589	12
13.775	79	9.5948	60	0.95629	46	-0.22532	97	7.8368	3	131.69	44	6.2721	10
13.825	77	9.6847	55	0.96599	50	-0.17533	91	7.8455	2	133.05	37	6.2854	12
13.875	80	9.7746	57	0.97568	42	-0.12533	95	7.8542	3	134.41	38	6.2987	4
13.925	74	9.8645	63	0.98538	45	-0.075338	94	7.8629	4	135.77	49	6.3119	6
13.975	83	9.9544	47	0.99508	41	-0.025342	98	7.8716	4	137.13	74	6.3252	5

## Sheet: Etna122BC_NonExplosive
Log10 BND (Nd)	Frequency	Tortuosity factor (m)	Frequency	Throat-pore ratio (ftb)	Frequency	Log10 Friction coefficient (f0)	Frequency	Log10 MER (kg/s)	Frequency	Exit velocity (m/s)	Frequency	Log10 Exit pressure (Pa)	Frequency
9.0254	52	1.055	24	0.034943	14	-4.9749	70	7.0097	2	2.4685	21	5.0123	47
9.0754	55	1.1449	20	0.044641	14	-4.9249	64	7.0184	1	3.8287	27	5.0256	26
9.1254	56	1.2348	19	0.05434	16	-4.8749	67	7.0271	0	5.1889	38	5.0388	21
9.1754	56	1.3247	24	0.064038	27	-4.8249	64	7.0358	1	6.549	93	5.0521	14
9.2254	54	1.4145	26	0.073737	20	-4.7749	61	7.0446	0	7.9092	138	5.0654	17
9.2754	65	1.5044	27	0.083435	21	-4.7249	65	7.0533	1	9.2694	160	5.0786	13
9.3253	60	1.5943	25	0.093133	27	-4.6749	62	7.062	1	10.63	201	5.0919	16
9.3753	58	1.6842	29	0.10283	32	-4.6249	67	7.0707	0	11.99	205	5.1051	14
9.4253	58	1.7741	36	0.11253	28	-4.5749	63	7.0794	0	13.35	209	5.1184	17
9.4753	47	1.864	30	0.12223	30	-4.5249	57	7.0881	2	14.71	198	5.1317	24
9.5253	53	1.9539	31	0.13193	34	-4.4749	74	7.0968	3	16.07	206	5.1449	14
9.5753	52	2.0438	31	0.14163	26	-4.4249	51	7.1055	4	17.431	171	5.1582	19
9.6253	51	2.1337	28	0.15132	28	-4.3749	63	7.1142	5	18.791	190	5.1714	23
9.6753	59	2.2236	35	0.16102	34	-4.3249	60	7.1229	3	20.151	174	5.1847	29
9.7253	54	2.3135	40	0.17072	37	-4.2749	72	7.1316	3	21.511	145	5.198	25
9.7753	52	2.4034	39	0.18042	32	-4.2249	60	7.1403	4	22.871	134	5.2112	24
9.8253	63	2.4933	40	0.19012	37	-4.1749	57	7.149	2	24.231	156	5.2245	38
9.8753	59	2.5832	40	0.19982	35	-4.1249	62	7.1577	2	25.592	114	5.2378	33
9.9253	59	2.673	35	0.20951	34	-4.075	64	7.1664	2	26.952	119	5.251	32
9.9753	61	2.7629	39	0.21921	35	-4.025	67	7.1751	4	28.312	96	5.2643	47
10.025	60	2.8528	50	0.22891	32	-3.975	54	7.1838	6	29.672	100	5.2775	57
10.075	59	2.9427	42	0.23861	37	-3.925	67	7.1925	1	31.032	137	5.2908	62
10.125	54	3.0326	53	0.24831	46	-3.875	55	7.2013	3	32.393	105	5.3041	60
10.175	56	3.1225	51	0.25801	28	-3.825	62	7.21	4	33.753	121	5.3173	91
10.225	60	3.2124	32	0.2677	40	-3.775	63	7.2187	6	35.113	100	5.3306	116
10.275	51	3.3023	44	0.2774	36	-3.725	55	7.2274	9	36.473	29	5.3438	142
10.325	56	3.3922	39	0.2871	41	-3.675	63	7.2361	6	37.833	9	5.3571	208
10.375	40	3.4821	47	0.2968	41	-3.625	62	7.2448	6	39.193	1	5.3704	252
10.425	57	3.572	49	0.3065	37	-3.575	72	7.2535	8	40.554	0	5.3836	352
10.475	51	3.6619	40	0.3162	31	-3.525	54	7.2622	16	41.914	0	5.3969	541
10.525	53	3.7518	47	0.32589	36	-3.475	61	7.2709	9	43.274	0	5.4102	762
10.575	52	3.8417	43	0.33559	37	-3.425	58	7.2796	10	44.634	0	5.4234	249
10.625	62	3.9316	45	0.34529	43	-3.375	57	7.2883	14	45.994	0	5.4367	12
10.675	54	4.0214	45	0.35499	44	-3.325	62	7.297	10	47.355	0	5.4499	0
10.725	55	4.1113	45	0.36469	41	-3.275	63	7.3057	13	48.715	0	5.4632	0
10.775	52	4.2012	44	0.37439	41	-3.225	67	7.3144	13	50.075	0	5.4765	0
10.825	49	4.2911	41	0.38408	33	-3.175	55	7.3231	23	51.435	0	5.4897	0
10.875	47	4.381	54	0.39378	39	-3.125	57	7.3318	15	52.795	0	5.503	0
10.925	40	4.4709	43	0.40348	45	-3.075	69	7.3405	17	54.156	0	5.5162	0
10.975	51	4.5608	58	0.41318	28	-3.0251	58	7.3492	9	55.516	0	5.5295	0
11.025	51	4.6507	45	0.42288	31	-2.9751	66	7.358	24	56.876	0	5.5428	0
11.075	38	4.7406	46	0.43258	37	-2.9251	65	7.3667	19	58.236	0	5.556	0
11.125	50	4.8305	47	0.44227	34	-2.8751	64	7.3754	19	59.596	0	5.5693	0
11.175	48	4.9204	50	0.45197	34	-2.8251	62	7.3841	24	60.956	0	5.5826	0
11.225	48	5.0103	40	0.46167	35	-2.7751	67	7.3928	30	62.317	0	5.5958	0
11.275	49	5.1002	37	0.47137	42	-2.7251	50	7.4015	30	63.677	0	5.6091	0
11.325	51	5.1901	41	0.48107	32	-2.6751	61	7.4102	22	65.037	0	5.6223	0
11.375	39	5.28	48	0.49077	41	-2.6251	54	7.4189	28	66.397	0	5.6356	0
11.425	50	5.3698	48	0.50046	43	-2.5751	55	7.4276	29	67.757	0	5.6489	0
11.475	42	5.4597	46	0.51016	46	-2.5251	55	7.4363	47	69.118	0	5.6621	0
11.525	52	5.5496	42	0.51986	44	-2.4751	58	7.445	46	70.478	0	5.6754	0
11.575	54	5.6395	39	0.52956	34	-2.4251	51	7.4537	44	71.838	0	5.6886	0
11.625	44	5.7294	42	0.53926	26	-2.3751	47	7.4624	55	73.198	0	5.7019	0
11.675	43	5.8193	46	0.54896	33	-2.3251	49	7.4711	70	74.558	0	5.7152	0
11.725	38	5.9092	45	0.55866	40	-2.2751	45	7.4798	70	75.918	0	5.7284	0
11.775	41	5.9991	43	0.56835	51	-2.2251	45	7.4885	90	77.279	0	5.7417	0
11.825	47	6.089	38	0.57805	45	-2.1751	47	7.4972	97	78.639	0	5.7549	0
11.875	47	6.1789	42	0.58775	38	-2.1251	49	7.5059	126	79.999	0	5.7682	0
11.925	33	6.2688	38	0.59745	46	-2.0751	49	7.5147	141	81.359	0	5.7815	0
11.975	37	6.3587	37	0.60715	47	-2.0251	40	7.5234	179	82.719	0	5.7947	0
12.025	38	6.4486	44	0.61685	40	-1.9752	37	7.5321	186	84.08	0	5.808	0
12.075	33	6.5385	34	0.62654	49	-1.9252	39	7.5408	270	85.44	0	5.8213	0
12.125	34	6.6284	53	0.63624	39	-1.8752	34	7.5495	309	86.8	0	5.8345	0
12.175	33	6.7182	45	0.64594	44	-1.8252	38	7.5582	307	88.16	1	5.8478	0
12.225	27	6.8081	43	0.65564	40	-1.7752	30	7.5669	390	89.52	5	5.861	3
12.275	24	6.898	50	0.66534	43	-1.7252	27	7.5756	396	90.881	6	5.8743	10
12.325	32	6.9879	36	0.67504	44	-1.6752	24	7.5843	319	92.241	12	5.8876	26
12.375	26	7.0778	44	0.68473	47	-1.6252	19	7.593	178	93.601	13	5.9008	41
12.425	30	7.1677	36	0.69443	45	-1.5752	19	7.6017	127	94.961	20	5.9141	56
12.475	23	7.2576	44	0.70413	37	-1.5252	11	7.6104	0	96.321	17	5.9273	59
12.525	21	7.3475	40	0.71383	52	-1.4752	8	7.6191	0	97.681	19	5.9406	57
12.575	22	7.4374	40	0.72353	52	-1.4252	7	7.6278	0	99.042	21	5.9539	51
12.625	23	7.5273	45	0.73323	52	-1.3752	14	7.6365	0	100.4	22	5.9671	52
12.675	19	7.6172	42	0.74292	38	-1.3252	1	7.6452	0	101.76	25	5.9804	54
12.725	20	7.7071	37	0.75262	40	-1.2752	11	7.6539	0	103.12	26	5.9937	61
12.775	18	7.797	36	0.76232	42	-1.2252	9	7.6626	0	104.48	20	6.0069	34
12.825	23	7.8869	38	0.77202	55	-1.1752	6	7.6714	0	105.84	25	6.0202	9
12.875	21	7.9767	48	0.78172	49	-1.1252	3	7.6801	0	107.2	27	6.0334	0
12.925	14	8.0666	38	0.79142	40	-1.0752	1	7.6888	0	108.56	24	6.0467	0
12.975	19	8.1565	32	0.80111	42	-1.0252	6	7.6975	0	109.92	19	6.06	0
13.025	16	8.2464	40	0.81081	44	-0.97525	0	7.7062	0	111.28	15	6.0732	0
13.075	10	8.3363	42	0.82051	37	-0.92526	1	7.7149	0	112.64	26	6.0865	0
13.125	22	8.4262	41	0.83021	39	-0.87526	1	7.7236	0	114	17	6.0997	0
13.175	18	8.5161	39	0.83991	46	-0.82527	0	7.7323	0	115.36	20	6.113	0
13.225	15	8.606	34	0.84961	37	-0.77527	0	7.741	0	116.72	30	6.1263	0
13.275	15	8.6959	35	0.8593	43	-0.72527	1	7.7497	0	118.08	27	6.1395	0
13.325	16	8.7858	50	0.869	55	-0.67528	0	7.7584	0	119.44	33	6.1528	0
13.375	13	8.8757	37	0.8787	54	-0.62528	0	7.7671	0	120.8	11	6.166	0
13.425	13	8.9656	47	0.8884	44	-0.57529	0	7.7758	0	122.16	22	6.1793	0
13.475	19	9.0555	33	0.8981	48	-0.52529	0	7.7845	0	123.52	9	6.1926	0
13.525	13	9.1454	29	0.9078	51	-0.4753	0	7.7932	0	124.89	1	6.2058	0
13.575	19	9.2353	34	0.91749	38	-0.4253	0	7.8019	0	126.25	0	6.2191	0
13.625	15	9.3251	33	0.92719	48	-0.37531	0	7.8106	0	127.61	0	6.2324	0
13.675	18	9.415	30	0.93689	53	-0.32531	0	7.8193	0	128.97	0	6.2456	0
13.725	11	9.5049	33	0.94659	54	-0.27532	0	7.828	0	130.33	0	6.2589	0
13.775	19	9.5948	30	0.95629	43	-0.22532	0	7.8368	0	131.69	0	6.2721	0
13.825	18	9.6847	32	0.96599	42	-0.17533	0	7.8455	0	133.05	0	6.2854	0
13.875	17	9.7746	28	0.97568	52	-0.12533	0	7.8542	0	134.41	0	6.2987	0
13.925	23	9.8645	22	0.98538	47	-0.075338	0	7.8629	0	135.77	0	6.3119	0
13.975	15	9.9544	26	0.99508	49	-0.025342	0	7.8716	0	137.13	0	6.3252	0
